1 **ALV-J and REV synergistically activate a new oncogene of**  
2 **KIAA1199 via NF- $\kappa$ B and EGFR signaling regulated by miR-147**

3 Defang Zhou<sup>1</sup>, Jingwen Xue<sup>1</sup>, Pingping Zhuang<sup>1</sup>, Xiyao Cui<sup>1</sup>, Shuhai He<sup>1</sup>, Shuai Su<sup>1</sup>, Guihua Wang<sup>1</sup>, Li  
4 Zhang<sup>1</sup>, Chengui Li<sup>1</sup>, Libo Huang<sup>1</sup>, Yingli Shang<sup>1</sup>, Venugopal Nair<sup>2</sup>, Yongxiu Yao<sup>2</sup>, Huangge Zhang<sup>3</sup>,  
5 Ziqiang Cheng<sup>1,\*</sup>

6 <sup>1</sup> College of Veterinary Medicine, Shandong Agricultural University, Tai'an, 271018, China, <sup>2</sup> The  
7 Pirbright Institute & UK-China Centre of Excellence on Avian Disease Research, Pirbright, Ash Road,  
8 Guildford, Surrey GU24 0NF, United Kingdom, <sup>3</sup> Hancock Street, Department of Microbiology &  
9 Immunology, James Brown Cancer Center, University of Louisville, Louisville, KY 40202, USA

10 All the authors e-mail address: Defang Zhou: [zhoudefang@126.com](mailto:zhoudefang@126.com); Jingwen Xue:  
11 [z1122013@foxmail.com](mailto:z1122013@foxmail.com); Pingping Zhuang: [zpp7989@163.com](mailto:zpp7989@163.com); Xiyao Cui: [2843577978@qq.com](mailto:2843577978@qq.com);  
12 Shuhai He: [coco.e2008@163.com](mailto:coco.e2008@163.com); Shuai Su: [ssu6307@163.com](mailto:ssu6307@163.com); Guihua Wang:  
13 [wguihua1126@163.com](mailto:wguihua1126@163.com); Li Zhang: [honey@sdau.edu.cn](mailto:honey@sdau.edu.cn); Chengui Li: [chgli1981@126.com](mailto:chgli1981@126.com); Libo  
14 Huang: [huanglibo123@126.com](mailto:huanglibo123@126.com); Yingli Shang: [yinglish@126.com](mailto:yinglish@126.com); Venugopal Nair:  
15 [venugopal.nair@pirbright.ac.uk](mailto:venugopal.nair@pirbright.ac.uk); Yongxiu Yao: [yongxiu.yao@pirbright.ac.uk](mailto:yongxiu.yao@pirbright.ac.uk); Huangge Zhang:  
16 [huangge.zhang@louisville.edu](mailto:huangge.zhang@louisville.edu); Ziqiang Cheng: [czqsd@126.com](mailto:czqsd@126.com).

17 \*To whom correspondence should be addressed. Tel: +86-13505484575; Fax: +86-538-8242544

18 Present Address: Ziqiang Cheng, College of Veterinary Medicine, Shandong Agricultural University,  
19 Tai'an, Shandong Province, 271018, China

20

## 21 **Abstract**

22 The tumorigenesis is the result of the accumulation of multiple oncogenes and tumor  
23 suppressor genes changes. Co-infection of avian leucosis virus subgroup J (ALV-J)  
24 and reticuloendotheliosis virus (REV), as two oncogenic retroviruses, showed  
25 synergistic pathogenic effects characterized by enhanced tumor initiation and  
26 progression. The molecular mechanism underlying synergistic effects of ALV-J and  
27 REV on the neoplasia remains unclear. Here, we found co-infection of ALV-J and  
28 REV enhanced the ability of virus infection, increased viral life cycle, maintained cell  
29 survival and enhanced tumor formation. We combined the high-throughput proteomic  
30 readout with a large-scale miRNA screening to identify which molecules are involved  
31 in the synergism. Our results revealed co-infection of ALV-J and REV activated a  
32 latent oncogene of KIAA1199 and inhibited the expression of tumor suppressor miR-  
33 147. Further, enhanced KIAA1199, down-regulated miR-147, activated NF- $\kappa$ B and  
34 EGFR were demonstrated in co-infected tissues and tumor. Mechanistically, we  
35 showed ALV-J and REV synergistically enhanced KIAA1199 by activation of NF- $\kappa$ B  
36 and EGFR signalling pathway, and the suppression of tumor suppressor miR-147  
37 was contributed to maintain the NF- $\kappa$ B/KIAA1199/EGFR pathway crosstalk by  
38 targeting the 3'UTR region sequences of NF- $\kappa$ B p50 and KIAA1199. Our results  
39 contributed to the understanding of the molecular mechanisms of viral synergistic  
40 tumorigenesis, which provided the evidence that suggested the synergistic actions of  
41 two retroviruses could result in activation of latent pro-oncogenes.

## 42 **Author summary**

43 The tumorigenesis is the result of the accumulation of multiple oncogenes and tumor  
44 suppressor genes changes. Co-infection with ALV-J and REV showed synergistic  
45 pathogenic effects characterized by enhanced tumor progression, however, the  
46 molecular mechanism on the neoplasia remains unclear. Our results revealed co-  
47 infection of ALV-J and REV promotes tumorigenesis by both induction of a latent  
48 oncogene of KIAA1199 and suppression of the expression of tumor suppressor miR-  
49 147. Mechanistic studies revealed that ALV-J and REV synergistically enhance  
50 KIAA1199 by activation of NF- $\kappa$ B and EGFR signalling pathway, and the suppression  
51 of tumor suppressor miR-147 was contributed to maintain the NF-  
52  $\kappa$ B/KIAA1199/EGFR pathway crosstalk by targeting the 3'UTR region sequences of  
53 NF- $\kappa$ B p50 and KIAA1199. These results provided the evidence that suggested the  
54 synergistic actions of two retroviruses could result in activation of latent pro-  
55 oncogenes, indicating the potential preventive target and predictive factor for ALV-J  
56 and REV induced tumorigenesis.

## 57 **Introduction**

58 Viral synergism occurs commonly in the nature when co-infection of two or more  
59 unrelated viruses invades the same host. As two oncogenic retroviruses, avian  
60 leukosis virus subgroup J (ALV-J) and reticuloendotheliosis virus (REV) are the  
61 optimal model to study the synergistic tumorigenesis mechanisms. Both ALV-J and  
62 REV consist of a set of retroviral genes, gag, pol, env and LTR, and mainly induce  
63 myelocytomas and reticuloendotheliosis, respectively (1, 2). Due to similar  
64 transmission routes, co-infection of ALV-J and REV can readily occur (3, 4), and

65 spread very rapidly (5-7). Co-infection of ALV-J and REV caused more serious  
66 pathogenic effects, including growth retardation, immunosuppression, secondary  
67 infection and accelerated neoplasia progression in chickens (3, 5), leading to an  
68 increased mortality. Although the significance of the viral synergism had aroused high  
69 concerns, the synergistic tumorigenesis mechanisms, especially in retrovirus co-  
70 infections, remains unknown.

71 In synergistic interactions, biological traits such as virus accumulation, phenotypic  
72 and cytopathological changes, tissue tropism, host range and transmission rates of  
73 one or both of the viruses are changed (8, 9). Viruses may interact directly by  
74 transcomplementation of defective functions or indirectly, through host responses  
75 such as the defence mechanism (10-12). Initially, single viral infection was thought to  
76 be fully responsible for the tumorigenesis of each virus, while it is now established  
77 that in many cases, multiple viruses collaborate as co-factors in tumor formation. For  
78 example, viruses such as the Epstein Barr virus (EBV), the Kaposi's sarcoma  
79 herpesvirus (KSHV), human immunodeficiency virus type 1 (HIV-1), human hepatitis  
80 C virus (HCV) show association with non-Hodgkin's lymphomas (13). Co-infection of  
81 any one or multiple viruses may establish an environment that enhances tumor  
82 initiation and progression (14, 15). In addition to clinical phenotype, experimental  
83 models of co-infection have identified a variety of mechanisms that might contribute  
84 to tumorigenesis, including viral cofactors (16-18), common signalling pathway  
85 targets (18, 19), epigenetic modifications (reprogramming) (20-23),  
86 microenvironmental abnormalities (13) and interference with cell death (24, 25).

87 However, whether the synergistic actions of two retroviruses result in activation of  
88 latent pro-oncogenes remains unclear.

89 For the retroviral genome packaging, ALV-J or REV needs to incorporate into  
90 equivalent amounts of cellular RNAs in vitro, which may direct or indirect active a  
91 latent oncogene (26-33). Most oncogenes have predominant roles in cancer, which  
92 include the receptor tyrosine kinase epidermal growth factor receptor (EGFR),  
93 nuclear factor- $\kappa$ B (NF- $\kappa$ B), the transcriptional regulator MYC, the small GTPase RAS  
94 and the phosphoinositide 3-kinase PI3K (34-39). Particularly, EGFR and NF- $\kappa$ B  
95 cooperate to provide oncogenic signals and promote tumor development by  
96 sustaining tumor cell proliferation, survival and invasiveness. NF- $\kappa$ B is activated upon  
97 EGFR, as well as NF- $\kappa$ B-dependent pathways underlying resistant to EGFR inhibitors  
98 (40). KIAA1199, which is reported in the Human Unidentified Gene-Encoded Large  
99 Proteins database, is a novel endoplasmic reticulum protein in cancer cell migration  
100 (41). In breast cancer, KIAA1199, as a NF- $\kappa$ B target gene, feeds back to impact on  
101 EGFR-dependent signalling.

102 MicroRNAs (miRNAs) constitute a large family of small noncoding RNAs  
103 functioning as major regulators of gene expressions in cancer development (42, 43).  
104 In consistent with single infection of retrovirus, co-infection of retrovirus and other  
105 virus also regulates the miRNA to mediate the cell signaling pathway through  
106 targeting the proto-oncogene. For instance, it has been verified that miR-718 and  
107 miR-891a-5p take part in regulating the PTEN/AKT/mTOR signaling pathway and NF-  
108  $\kappa$ B signaling pathway in the synergistic infection of HIV-1 and KSHV, respectively (18,

109 44). MiR-147, upregulated by multiple TLRs in inflammatory response (45), had been  
110 reported to play a part in suppressing tumor by targeting EGFR-driven cell-cycle  
111 network proteins and inhibit cell-cycle progression and proliferation in breast cancer  
112 (46). Since a miRNA has multiple target genes, the molecular targets for miR-147  
113 mediated regulation of inhibition of ALV-J and REV induced tumorigenesis remains to  
114 be identified.

115 Here, we investigated the synergistic mechanism of ALV-J and REV on  
116 tumorigenesis. We revealed that ALV-J and REV synergistically activate a latent  
117 oncogene KIAA1199 and inhibit a tumor suppressor miR-147. Furthermore, we  
118 demonstrated that the NF- $\kappa$ B/KIAA1199/EGFR pathway crosstalk that is targeted by  
119 miR-147 plays a pivotal role in the synergistic tumorigenesis of ALV-J and REV,  
120 providing the theoretical basis for further revealing the mechanism of tumor  
121 synergism.

## 122 **Results**

123 **ALV-J synergizes REV to promote the viral replication and cell survival**  
124 To determine whether co-infection of ALV-J and REV has different effect on the  
125 recipient cells from single infection, we conducted viral RNA transcription and  
126 replication, protein expression and localization test. We caught the two viral particles  
127 of ALV-J and REV in the same cell by electron microscopy (Fig 1A), indicating co-  
128 infection of a single cell. The qRT-PCR results showed the RNA level of REV in co-  
129 infected cells was higher ( $P < 0.05$ ) than those in single infected cells at 24 hpi to 96  
130 hpi, and reached the highest peak at 72 hpi. ALV-J increased REV replication by

131 683.7- to 2882-fold (Fig 1B). In contrast, the RNA level of ALV-J showed no  
132 significant change between single and dual infection (Fig 1C). To further understand  
133 whether ALV-J and REV affect replication and subcellular localization each other in  
134 co-infected group, viral protein accumulation was observed dynamically by CLSM  
135 (Fig 1D). Dynamic analysis in single infected cells revealed that the ALV-J env protein  
136 accumulated in the cytoplasm and the nucleus at 48 hpi, and mainly localized in the  
137 cytoplasm with little remaining in the nucleus at 72 hpi. Accordingly, the REV env  
138 protein started accumulation in the cytoplasm of CEF at 72 hpi but not in the nucleus.  
139 Interestingly, in co-infected cells, the REV env protein started accumulation in the  
140 cytoplasm of cells at 48 hpi, and more ALV-J env protein production accumulated in  
141 cytoplasm than single infection. It is worth to note that ALV-J env protein started to  
142 appear in the nucleus at 96 hpi of co-infection. To further understand whether ALV-J  
143 synergizes REV to affect the proliferation rates of CEF cells, the number of the cells  
144 was tested by CCK-8 kit. Consequently, ALV-J and REV synergized with each other  
145 and further promote cell survival, indicating the high proliferation rate might associate  
146 with neoplasia (Fig 1E).

#### 147 ALV-J synergizes REV to enhance pathogenicity and tumorigenesis

148 We established the animal model of co-inoculation of ALV-J and REV in allantoic  
149 cavity of fertilized SPF eggs at 6-day of embryonic age. The hatching rates, weights,  
150 H&E staining and qRT-PCR were used for confirming the synergistic pathogenicity  
151 and tumorigenesis of ALV-J and REV in vivo. The number of death in embryos  
152 showed that ALV-J synergized with REV to further decrease the hatching rate (Table

153 2). After hatching, both ALV-J and REV synergized with each other and further  
154 decreased the weights of chicken (Fig 2A). H&E staining results showed there are  
155 massive inflammatory cells that infiltrated around the blood vessel in liver and  
156 pancreas of chicken infected ALV-J, REV or both. Some lymphocytic focal  
157 inflammatory infiltrates were also observed in substantial areas of liver and kidney,  
158 and the demarcation between medulla and cortex in the thymus seemed to disappear  
159 (Fig 2B). The qRT-PCR results showed both viral RNA levels of liver, kidney, bursa of  
160 Fabricius, bone marrow and heart in co-infection group were higher ( $P < 0.05$ ) than  
161 those in single infection group. REV increased ALV-J by 5.56-, 1.25-, 4.923-, 2.33-  
162 and 5.85-fold in liver, kidney, bone marrow, bursa of Fabricius and heart of co-  
163 infection group (Fig 2C), respectively, and ALV-J increased REV by 5.62-, 1.52-,  
164 3.23-, 3.07- and 2.37-fold in the corresponding organs (Fig 2D), respectively. Further,  
165 some additional white nodules were observed in endocardium of co-infection group  
166 (Fig 2E). H&E staining results showed these white endocardial nodules were fibroma  
167 (Fig 2E). Collectively, co-infection of ALV-J and REV leads to induction of  
168 inflammation and tumorigenesis.

### 169 ALV-J synergizes with REV to activate KIAA1199 and inhibit miR-147

170 To explore the synergistic tumorigenesis mechanism induced by ALV-J and REV,  
171 CEFs infected with ALV-J, REV or both were analyzed using iTRAQ quantitative  
172 proteomic analysis and miRNA whole-genome sequencing using the same batch of  
173 cell samples at 72 hpi. The protein thermodynamic chart showed there are 33  
174 differentially expressed proteins in co-infected cells (Fig 3A). Interestingly, among the



175 different expression proteins, KIAA1199 was declined in single-infected cells, while  
176 increased in co-infected cells. Further, western blot analysis showed ALV-J or REV  
177 decreased the KIAA1199 protein expression by 0.85- and 0.74-fold, respectively,  
178 while ALV-J synergized with REV to increase the KIAA1199 protein expression by  
179 1.38-fold (Fig 3B). However, qRT-PCR result showed ALV-J, REV or both increased  
180 the KIA1199 RNA level by 2.59-, 2.41- and 3.89-fold, respectively (Fig 3C). The  
181 miRNA whole-genome sequencing showed miRNAs expression in the cells infected  
182 with ALV-J, REV, or both changed significantly compared to the Mock group.  
183 Interestingly, MiR-147 was the only downregulated miRNA in co-infection group, and  
184 we hypothesized that it has putative targeting sites in the 3'UTR of KIAA1199 (Fig  
185 3D). The qRT-PCR result confirmed that co-infecting ALV-J and REV indeed  
186 decreased the expression of miR-147 in CEF cells, but CEF cell infected with single  
187 ALV-J or REV infection has increased the level of miR-147 (Fig 3E). To explore  
188 whether the above in vitro results were consistent with the chicken co-infected with  
189 ALV-J and REV at 60 dpi, we detected the RNA levels of KIAA1199 and miR-147 by  
190 qRT-PCR and protein expressions of KIAA1199 by IHC in liver, kidney, bone marrow,  
191 bursa of Fabricius and heart. The qRT-PCR results showed ALV-J synergized with  
192 REV to increase the KIAA1199 RNA level in liver, kidney, bone marrow bursa of  
193 Fabricius and heart (Fig 4A). Interesting, the IHC showed the expression levels of  
194 KIAA1199 were significantly increased in bone marrow, kidney and heart of ALV-J  
195 and REV co-infected group (Fig 4B and C), while that was not significantly increased  
196 in liver and bursa of Fabricius. The miR-147 expression was inhibited by co-infection

197 of ALV-J and REV in kidney, bone marrow and heart, while that was increased in liver  
198 and bursa of Fabricius (Fig 4E), which was reversely co-related with KIAA1199  
199 protein levels. Further, the high expression of KIAA1199 was also verified in  
200 endocardial fibroma by IHC. As expected, the level of KIAA1199 was significantly  
201 increased in fibroma cells and stroma and myocardial cells (Fig 4D), and the  
202 expression of miR-147 was decreased by ALV-J and REV co-infection (Fig 4E). In  
203 summary the data generated from both in vitro and in vivo demonstrated that co-  
204 infection of ALV-J with REV results in activation of KIAA1199 and inhibition of  
205 expression of miR-147.

206 ALV-J and REV synergistically activated KIAA1199 via NF- $\kappa$ B and EGFR  
207 signaling

208 Previous study showed KIAA1199, which is transcriptionally induced by NF- $\kappa$ B  
209 proteins, promotes EGFR stability and signaling in breast cancer (40, 47). To explore  
210 the mechanism of KIAA1199 activation in mediating the synergistic effect of ALV-J  
211 and REV, the expression of NF- $\kappa$ B p65, p50 and EGFR were detected by qRT-PCR,  
212 western blotting and ELISA. The qRT-PCR of NF- $\kappa$ B results showed, compared with  
213 single infected ALV-J and REV, co-infection of ALV-J and REV increased the p65  
214 RNA level by 1.78- and 1.91-fold, respectively (Fig 5A) and raised p50 RNA level by  
215 2.51- and 2.03-fold, respectively (Fig 5B). The changes of western blot or ELISA  
216 results were consistent with above results that ALV-J synergizes with REV to further  
217 activate NF- $\kappa$ B signaling (Fig 5C and D). The qPCR of EGFR results also showed  
218 that ALV-J or REV decreased the EGFR RNA level by 0.42- and 0.81-fold,

219 respectively, while ALV-J synergized with REV to increase the EGFR RNA level by  
220 1.96-fold (Fig 5E). Further, western blot or ELISA results were consistent with the  
221 KIAA1199 protein expression in DF-1 cells infected with ALV-J, REV, or both. To  
222 explore whether the above results were consistent with the in vivo data of chicken  
223 infected with ALV-J and REV, the activation of NF- $\kappa$ B and EGFR RNA were detected  
224 using the chicken NF- $\kappa$ B P-I $\kappa$ B $\alpha$  ELISA kit and qRT-PCR in chicken co-infected with  
225 ALV-J and REV. The P-I $\kappa$ B $\alpha$  ELISA results showed that co-infection of ALV-J and  
226 REV increased the levels of phosphorylated I $\kappa$ B $\alpha$  in liver, kidney, bone marrow, bursa  
227 of Fabricius and heart (Fig 5F). Furthermore, ALV-J synergized with REV to enhance  
228 the EGFR levels in kidney, bone marrow, bursa of Fabricius and heart, while that  
229 decreased in liver (Fig 5G).

230 To further determine whether NF- $\kappa$ B is required for induction of KIAA1199 and  
231 EGFR, we constructed and transfected the NF- $\kappa$ B p65 shRNAs into the DF-1 cells.  
232 Indeed, when NF- $\kappa$ B p65 was knockdown, the RNA levels of KIAA1199 and EGFR  
233 were decreased (Fig 6A, B and C). Identical results were observed in KIAA1199  
234 inhibition (Fig 6D, E and F).

235 Together these data suggest that ALV-J and REV synergistically activate the NF-  
236  $\kappa$ B /KIAA1199/EGFR pathway.

### 237 Cellular miR-147 targets NF- $\kappa$ B /KIAA1199/EGFR pathway

238 To explore whether miR-147 directly target KIAA1199, the relationship of miR-147  
239 and KIAA1199 were verified by dual-luciferase assay. Indeed, KIAA1199 3'UTR  
240 luciferase reporter assay showed that miR-147 significantly inhibited the activity of

241 KIAA1199 3'UTR reporter but not that of the control reporter (Fig 7A). MiR-147  
242 inhibited the activity of the KIAA1199 3'UTR reporter and the endogenous KIAA1199  
243 expression in CEF in a dose-dependent manner (Fig 7B and 7C). On the contrary, a  
244 miR-147 inhibitor up-regulated the endogenous KIAA1199 expression level in a dose-  
245 dependent manner (Fig 7D). Bioinformatics analysis identified one putative miR-147  
246 binding site at the KIAA1199 3'UTR (Fig 7E). Mutation of this site abolished the miR-  
247 147 inhibitory effect on KIAA1199 3'UTR reporter activity (Fig 7F). These data  
248 suggest that miR-147 directly targets KIAA1199.

249 Interestingly, previous study showed miR-147 is a member of suppressors for  
250 targeting EGFR signaling proteins (46). As the close cooperation of NF- $\kappa$ B, KIAA1199  
251 and EGFR, miR-147 may also have some connection to NF- $\kappa$ B in mediating the  
252 synergistic effect of ALV-J and REV. To evaluate the relationship with NF- $\kappa$ B  
253 signaling, miR-147 was also predicted with the related proteins. As expected,  
254 bioinformatics analysis identified one putative miR-147 binding site in the 3'UTR of  
255 NF- $\kappa$ B p50 (Fig 7G). Further, NF- $\kappa$ B p50 3'UTR luciferase reporter assay showed that  
256 miR-147 significantly inhibited the activity of NF- $\kappa$ B p50 3'UTR reporter but not that of  
257 the control reporter (Fig 7H). MiR-147 inhibited the activity of the NF- $\kappa$ B 3'UTR  
258 reporter and the NF- $\kappa$ B p50 expression in CEF in a dose-dependent fashion (Fig 7C  
259 and I). A miR-147 inhibitor up-regulated the NF- $\kappa$ B p50 expression level in a dose-  
260 dependent manner (Fig 7D). Mutation of this site abolished the miR-147 inhibitory  
261 effect on NF- $\kappa$ B p50 3'UTR reporter activity (Fig 7J). These data suggest that miR-  
262 147 also directly targets NF- $\kappa$ B p50 besides KIAA1199.

## 263 **Discussion**

264 In this study, a specific synergism was observed in ALV-J and REV co-infected  
265 CEFs that characterized by extremely enhanced the ability of virus infection,  
266 increased viral life cycle, maintained cell survival, and chickens that characterized by  
267 severe weight loss, more shedding virus (viral loading), more serious pathological  
268 changes including severe inflammation, enhanced tumor formation and extended  
269 tumor spectrum. One of molecular mechanisms underlying the synergism is  
270 demonstrated in this study. We found that co-infection of ALV-J and REV activates  
271 NF- $\kappa$ B mediated inflammation pathway that causes upregulation of p50 and p65,  
272 leading to increased KIAA1199 gene transcription. KIAA1199 also activate EGFR  
273 signaling to promote NF- $\kappa$ B pathway stability, and finally formed the signaling  
274 pathway crosstalk. Furthermore, the suppression of tumor suppressor miR-147 was  
275 contributed to maintain the NF- $\kappa$ B/KIAA1199/EGFR pathway crosstalk by targeting  
276 the 3'UTR region sequences of NF- $\kappa$ B p50 and KIAA1199 (Fig 8).

277 Previous studies on the mechanisms of tumor initiation and progression by  
278 synergistic interactions had been limited in viral cofactors (16-18), common signalling  
279 pathway targets (18, 19), epigenetic modifications (reprogramming) (20-23),  
280 microenvironmental abnormalities (13) and interference with cell death (24, 25). In  
281 current study, we found ALV-J and REV synergistically activated a new oncogene of  
282 KIAA1199 by the inhibition of miR-147 and enhancement of NF- $\kappa$ B, which provided  
283 the powerful evidence that suggested the synergistic actions of two retroviruses could  
284 result in activation of latent pro-oncogenes.

285 Mechanistic studies revealed that ALV-J and REV synergistically enhances the  
286 expression of KIAA1199 via NF- $\kappa$ B mediated pathway. We also verified ALV-J  
287 synergizes with REV to promote NF- $\kappa$ B signaling and EGFR signaling in vitro and  
288 vivo. Further, the results of the NF- $\kappa$ B p65 and KIAA1199 shRNA tests validated the  
289 existence of NF- $\kappa$ B /KIAA1199/EGFR pathway crosstalk in co-infection of ALV-J and  
290 REV indirectly. However, the protein expression of KIAA1199 and its down-stream  
291 EGFR were inhibited in single infected ALV-J or REV. Therefore, the different  
292 regulations of KIAA1199 may provide an important role of tumor progress. Previous  
293 studies showed that as an oncogene, KIAA1199 expression is enhanced in breast,  
294 gastric and colon cancer (41, 48-51). In current study, ALV-J synergized with REV to  
295 increase the KIAA1199 expression in bone marrow, kidney, heart and endocardial  
296 fibroma, indicating the tissue specificity of KIAA1199 and the correlation to tumor  
297 spectrum extending.

298 Previous studies have shown that both NF- $\kappa$ B and EGFR signaling pathways could  
299 be activated by single-infecting ALV-J or REV. For instant, ALV-J induces VEGF  
300 expression via NF- $\kappa$ B/PI3K-dependent IL-6 production to promote tumorigenesis (52-  
301 54). In ALV-induced erythroblastosis, c-erbB encodes the carboxyl-terminal domain  
302 of the epidermal growth factor receptor (55, 56). NF- $\kappa$ B activation increased in  
303 expression of v-rel avian reticuloendotheliosis viral oncogene homolog (c-REL) to  
304 transduce and activate EGFR (57). As the considerable participators in various  
305 biological processes, NF- $\kappa$ B and EGFR pathways are involved in different stages of  
306 tumorigenesis induced by viruses, such as invasion, proliferation of tumor cells,

307 apoptosis, migration and angiogenesis. While growth factors trigger NF- $\kappa$ B-activating  
308 cascades upon binding to ERBB members, the transcriptional induction of some NF-  
309  $\kappa$ B target genes, such as KIAA1199, also feeds back to impact on EGFR-dependent  
310 signaling pathways. Although this similar phenomenon had been verified in breast  
311 cancer or neck squamous cell carcinomas (HNSCCs) (47, 58-60), indicating this  
312 crosstalk was emerged as the results by viruses synergistic infection.

313 Compared to single infection, the protein expression of KIAA1199 was only  
314 increased in co-infection group but not single infection, while the KIAA1199 RNA  
315 levels was increased in each group, implying that co-infection of ALV-J with REV  
316 regulated KIAA1199 post transcriptionally, and there were also some key molecular  
317 regulators to determine the expression of KIAA1199 protein. Among many of the  
318 miRNA biomarkers, miR-147 was still recognized as an important factor in  
319 inflammatory responses and cancer. In small-cell lung cancer, miR-147 was found to  
320 be closely associated with cancer chemo resistance (61). MiR-147 is expressed in  
321 normal lung tissues and was upregulated as part of the inflammatory responses (45).  
322 In this study, the expressions of miR-147 were decreased in kidney, bone marrow  
323 and heart, which were correlated with the oncogene KIAA1199 activation by co-  
324 infection of ALV-J and REV. Conversely, the KIAA1199 levels were inhibited by miR-  
325 147 in liver and bursa of Fabricius suggesting that miR-147 also acted as a  
326 suppressor (62). MiR-147 was also a potential suppressor that targets EGFR-driven  
327 cell-cycle network protein in breast cancer (46). As NF- $\kappa$ B, KIAA1199 and EGFR  
328 pathway were connected closely in cancer, miR-147 was also analysed with NF- $\kappa$ B

329 signaling proteins. As expected, bioinformatics analysis also identified one putative  
330 miR-147 binding site in the 3'UTR of NF- $\kappa$ B p50. Relative to the suppression for  
331 EGFR-driven cell-cycle protein, miR-147 was a key to NF- $\kappa$ B/KIAA1199/EGFR  
332 pathway crosstalk activation during ALV-J synergizes with REV. This initial finding will  
333 open up a new avenue for further identifying factors that regulate the stability of  
334 KIAA1199 protein.

335 In summary, our results demonstrate that co-infection of ALV-J and REV promotes  
336 tumorigenesis by both induction of a latent oncogene of KIAA1199 and suppression  
337 of the expression of tumor suppressor miR-147 through activation of NF- $\kappa$ B and  
338 EGFR signalling pathway crosstalk. As a negative feedback mechanism, KIAA1199 is  
339 also directly targeted by overexpressed miR-147 for inhibition of production of  
340 KIAA1199 protein. Our results contributed to the understanding of the molecular  
341 mechanisms of viral synergistic tumorigenesis, which provided the powerful evidence  
342 that suggested the synergistic actions of two retroviruses could result in activation of  
343 latent pro-oncogenes.

## 344 **Methods**

### 345 **Cells, virus, and plasmids**

346 Human 293T cells were purchased from Procell Life Science & Technology Ltd.,  
347 China. Avian DF-1 cells and chicken embryo fibroblasts (CEFs) cells were  
348 propagated and maintained in Dulbecco's Modified Eagle's Medium (DMEM)  
349 supplemented with 10% fetal bovine serum (FBS), 1% penicillin/streptomycin, 1% L-  
350 glutamine, and in a 5% CO<sub>2</sub> incubator at 37°C (63, 64).The stock SNV strain of REV



351 at  $10^{3.2}$  50% tissue culture infectious doses (TCID<sub>50</sub>) and NX0101 strain of ALV-J at  
352  $10^{3.8}$  TCID<sub>50</sub> were maintained in our laboratory, respectively. The TCID<sub>50</sub> of SNV and  
353 NX0101 strain were titrated by limiting dilution in DF-1 culture. The KIAA1199 and  
354 NF- $\kappa$ B p50 3'UTR were cloned into the downstream of luciferase reporter gene of  
355 pmirGLO Control vector to create wild type pmirGLO-KIAA1199 3'UTR (WT  
356 KIAA1199) and pmirGLO-p50 3'UTR (WT p50) plasmids, respectively (GenePharma,  
357 Shanghai, China). Bioinformatics analysis software tools and web sites, including  
358 RNA22, NCBI and ENSEMBLE, were used to analyse and predict the binding sites  
359 between miR-147 and 3'UTR of KIAA1199 or NF- $\kappa$ B p50. The construction of the  
360 pmirGLO-KIAA1199 3'UTR mutant plasmid (Mut KIAA1199) and the pmirGLO-p50  
361 3'UTR mutant plasmid (Mut p50) were constructed by site-directed mutagenesis.

## 362 Pathogenicity and tumorigenesis assay in SPF chickens

363 Specific pathogen free (SPF) chicken embryos were purchased from the SPAFAS  
364 Co. (Jinan, China; a joint venture with Charles River Laboratory, Wilmington, MA,  
365 USA). 150 SPF chicken embryos were divided into 4 groups placed in separated  
366 incubators receiving filtered positive-pressure air. All embryos were inoculated via  
367 allantoic cavity at 6-day of embryonic age with ALV-J of 100 $\mu$ l  $10^{3.8}$  TCID<sub>50</sub> and 100 $\mu$ l  
368 DMEM per egg (30 eggs), REV of 100 $\mu$ l  $10^{3.2}$  TCID<sub>50</sub> and 100 $\mu$ l DMEM per egg (30  
369 eggs), or both ALV-J of 100 $\mu$ l  $10^{3.8}$  TCID<sub>50</sub> and REV of 100 $\mu$ l  $10^{3.2}$  TCID<sub>50</sub> per egg (60  
370 eggs). The embryos from Mock were inoculated with 200 $\mu$ l DMEM (30 eggs). After  
371 hatching, the shedding virus was tested by ELISA for p27 antigen of ALV-J from  
372 cloacal swabs or qPCR for REV LTR gene from blood, respectively. All birds were

373 weighed and clinical performance was recorded each week. To observe the  
374 pathogenicity and tumorigenesis, 6 chickens from each group were euthanatized and  
375 examined post-mortem at 60 days. Every tissue from each chicken was divided into  
376 four portions for histopathology, immunohistochemistry (IHC), ELISA and western  
377 blot assay. The RNA was extracted from liver, kidney, bone marrow, bursa of  
378 Fabricius and heart to detect the viral RNA, KIAA1199, EGFR or miR-147.

### 379 iTRAQ-labelled LC-MS/MS

380 SDT buffer was added to the CEF sample either Mock or infected with ALV-J or REV  
381 alone, or co-infected with both ALV-J and REV for 72 hpi. The lysate was sonicated  
382 and then boiled for 15 minutes. After centrifuged at 14, 000×g for 40 minutes, the  
383 supernatant was quantified with the BCA Protein Assay Kit (Bio-Rad, USA). Proteins  
384 for each sample were separated by SDS-PAGE, prepared by sample filter-aid, and  
385 labelled using iTRAQ reagent according to the manufacturer's instructions (Applied  
386 Biosystems). The iTRAQ labelled peptides were fractionated by SCX  
387 chromatography using the AKTA Purifier system (GE Healthcare). Each fraction was  
388 injected for nanoLC-MS/MS analysis. LC-MS/MS analysis was performed on a Q  
389 Exactive mass spectrometer (Thermo Scientific). MS/MS spectra were searched  
390 using MASCOT engine (Matrix Science, London, UK; version 2.2) embedded into  
391 Proteome Discoverer 1.4.

### 392 Illumina small RNA deep sequencing

393 Total RNA of the infected CEF sample, the same batch of samples as in iTRAQ  
394 assay, was separated by 15% agarose gels to extract the small RNA (18-30 nt). After

395 precipitated by ethanol and centrifugal enrichment of small RNA population, the  
396 library was prepared according to the method and process of Small RNA Sample  
397 Preparation Kit (Illumina, RS-200-0048). RNA concentration of the library was  
398 measured using Qubit® RNA Assay Kit in Qubit® 2.0 to preliminary quantify and then  
399 dilute to 1ng/µl. Insert size was assessed using the Agilent Bioanalyzer 2100 system  
400 (Agilent Technologies, CA, USA), The library with the expected insert size was then  
401 quantified accurately using Taqman fluorescence probe of AB Step One Plus Real-  
402 Time PCR system (Library valid concentration>2nM).The qualified libraries were  
403 sequenced by an Illumina Hiseq 2500 platform and 50 bp single-end reads were  
404 generated.

#### 405 RNA interference

406 Two shRNAs targeting each gene were co-transfected into DF-1. shRNAs, 5'-  
407 GCATTGAGGAGAAGCGCAAAC-3' and 5'-GAAAGAGGACATCGAGGTTTCG-3'  
408 targeting NF-κB p65, and 5'-GCTGGAATGATCATCGATAAC-3' and 5'-  
409 GCATGGAAGAAGGCGGATATT-3' targeting KIAA1199 were purchased from  
410 GenePharma (Shanghai, China).

#### 411 MiRNA mimics and inhibitors

412 The sequence of commercially available miR-147 mimics was 5'-  
413 GUGUGCGGAAAUGCUUCUGCAGAAGCAUUUCCGCACACUU-3'; the negative  
414 control sequence was 5'-UUCUCCGAACGUGUCACGUTT-3'; 5'-  
415 ACGUGACACGUUCGGAGAATT-3'; the sequence of miR-147 inhibitor was 5'-  
416 GCAGAAGCAUUUCCGCACAC-3'; and the inhibitor negative control sequence was

417 5'-CAGUACUUUUGUGUAGUACAA-3'. MiRNA mimics and miRNA inhibitor were  
418 purchased from GenePharma (Shanghai, China).

#### 419 Luciferase reporter assay

420 The miRNA mimics, KIAA1199 3'UTR or NF- $\kappa$ B p50 3'UTR luciferase reporter  
421 plasmid were co-transfected into 293T cells. At 48hpi, cell lysates were prepared  
422 according to the manufacture's instruction. Luciferase activity was measured with a  
423 Dual-Luciferase Reporter Assay System (Beyotime Co., Ltd) and normalized against  
424 the activity of the Renilla luciferase gene.

#### 425 Western blotting

426 To test KIAA1199, NF- $\kappa$ B p65 and p50 expression, DF-1 cells were lysed in cell lysis  
427 buffer (Beyotime) and incubated on ice for 5 minutes. The lysates were resuspended  
428 in SDS loading buffer, boiled for 5 minutes, loaded and run on a 6% (KIAA1199) and  
429 10% (NF- $\kappa$ B p65 and p50) SDS-PAGE, respectively, and then transferred onto a  
430 nitrocellulose membrane (Solarbio). The nitrocellulose membrane was blocked with  
431 5% skimmed milk at 4°C overnight and probed with anti-KIAA1199 (Bioss), anti-p50  
432 (Abways) and anti-phospho-p65 (Abways) antibody at a 1:100, 1:500 and 1:5000  
433 dilution, respectively, followed by horseradish peroxidase (HRP)-conjugated goat  
434 anti-mouse secondary antibody (Bioss) at a 1:3000 dilution. The beta-actin was used  
435 as loading control. Detection was performed with Enhanced HRP-DAB Chromogenic  
436 Substrate Kit (Tiangen) according to the manufacturer's instructions.

#### 437 Transmission electron microscopy

438 The protocol was conducted as described in the previous study (65).

### 439 Confocal microscopy assay

440 For confocal microscopy assay, the cells were washed three times with PBS (137mM  
441 NaCl, 2.7mM KCl, 10mM Na<sub>2</sub>HPO<sub>4</sub>, and 2mM KH<sub>2</sub>PO<sub>4</sub>) and were fixed in fixative (1ml  
442 of fixative contains 600µl of acetone plus 400µl of alcohol) at 24h, 48h, 72h and  
443 96hpi. 7 minutes later, the fixative was removed and the cells were washed three  
444 times with PBS. Then, the cells were incubated with anti-env of REV (1:200) or anti-  
445 gp85 of ALV-J (1:200) antibody at 4°C for 10h. After that, the cells were washed three  
446 times with PBS, and incubated with HRP-labelled Goat anti-rabbit IgG (H+L) (1:5000)  
447 and HRP-labelled Goat anti-mouse IgG (H+L) (1:5000) at 37°C for 1.5h. After  
448 washing three with PBS, Nucleuses were stained with DAPI at 37°C for 5 minutes,  
449 and then the cells were washed three times with PBS again. Finally, the cells with 1ml  
450 of 50% glycerol were observed in Confocal laser scanning microscopy (CLSM)  
451 immediately.

### 452 Hematoxylin and eosin (H&E) and immunohistochemical staining

453 The liver, kidney, bone marrow, pancreas, bursa of Fabricius and thymus of chicken  
454 were formalin-fixed, paraffin embedded, sectioned, and stained for histopathology  
455 observation. For immunohistochemical analysis, paraffin sections were  
456 deparaffinized and rehydrated in graded alcohols and antigen retrieval was  
457 performed using citrate buffer in a pressure cooker for 6 minutes. The home-made  
458 anti-KIAA1199 antibody (1:100) was used for the primary reaction.  
459 Immunoperoxidase staining was performed using the LSAB kit (Dako, Glostrup,

460 Denmark), according to the supplier's recommendations. Positive cells were  
461 visualized using a 3, 3'-diaminobenzidine substrate and the sections were  
462 counterstained with haematoxylin.

463 The immunolabelled tissues were evaluated by using a semi-quantitative score of  
464 the intensity and extent of the staining according to an arbitrary scale (47).

#### 465 Real-time quantitative reverse transcription polymerase chain reaction

466 The specific primer sequences of KIAA1199, NF- $\kappa$ B p50, NF- $\kappa$ B p65, EGFR and  
467 GAPDH were listed in Supplementary Table S1. Total RNA from CEF either Mock,  
468 single infection of ALV-J or REV, or co-infection of both ALV-J and REV, were  
469 isolated using Tiangen RNeasy mini kit as per manufacturer's instructions, with  
470 optional on-column DNase digestion, respectively. RNA integrity and concentration  
471 were assessed by agarose gel electrophoresis and spectrophotometry. RNA (1 $\mu$ g per  
472 triplicate reaction) was reverse transcribed to cDNA using the Taqman Gold Reverse  
473 Transcription kit (Applied Biosystems). Real-time RT-PCR (qRT-PCR) was carried  
474 out using SYBR<sup>®</sup> Premix Ex Taq<sup>™</sup>, and ALV-J or REV specific primers  
475 (Supplementary Table S1). All values were normalized to the endogenous control  
476 GAPDH to control for variation. For qRT-PCR of miR-147, we used a miRcute miRNA  
477 first-stand cDNA synthesis kit and a miRcute miRNA qPCR detection kit (SYBR  
478 Green) (TIANGEN). The miRNA-specific forward primer used for qPCR is 5'-  
479 GGTGTGCGGAAATGCTTCTGC-3'. The reverse primer was provided in the miRcute  
480 miRNA qPCR detection kit as a primer complementary to the poly (T) adapter. Data  
481 were collected on an ABI PRISM 7500 and analyzed via Sequence Detector v1.1

482 software. All values were normalized to the endogenous control U6 to control for  
483 variation. The specific primer of U6 was described in Supplementary Table S1.  
484 Assays were performed in triplicate and average threshold cycle (CT) values were  
485 used to determine relative concentration differences based on the  $\Delta\Delta CT$  method of  
486 relative quantization described in the manufacturer's protocol.

#### 487 Cell Counting Kit (CCK-8) for cell proliferation assay

488 Cell Count Kit-8 was purchased from Solarbio (Beijing, China) and used to examine  
489 cell proliferation according to the manufacturer's instructions.

#### 490 ELISA for NF- $\kappa$ B p65 and P-I $\kappa$ B $\alpha$ assay

491 Chicken NF- $\kappa$ B p65 ELISA kit and Chicken NF- $\kappa$ B P-I $\kappa$ B $\alpha$  ELISA kit were purchased  
492 from Senbeijia (Nanjing, China) and used to assay the expression of NF- $\kappa$ B p65  
493 according to the manufacturer's instructions.

#### 494 Statistical analysis

495 Results are presented as the mean  $\pm$  standard deviation(s). The T test and ONEWAY  
496 ANOVA test was performed using SPSS 13.0 statistical software. A P value less than  
497 0.05 was considered statistically significant.

#### 498 Accession numbers

499 The Illumina small RNA deep sequencing data for the reported miRNAs has been  
500 deposited with the NCBI GEO under accession number GSE109105.

#### 501 Ethics Statement

502 The experiment was carried out in strict accordance with the recommendations in the  
503 Guide for the Care and Use of Laboratory Animals of the Ministry of Science and  
504 Technology of the People's Republic of China. The protocol was approved by the  
505 Committee on the Ethics of Animal Experiments of the Shandong Province (Permit  
506 Number: 20150124).

## 507 **Acknowledgements**

508 We are grateful to Prof. Yi Tang and Prof. Xiaomin Zhao for their helpful discussion  
509 and manuscript revision. We thank Dr Gen Li, Dr Mingjun Zhu and Dr Tianle Chao for  
510 their technical assistance.

## 511 **References**

- 512 1. Payne LN, Brown SR, Bumstead N, Howes K, Frazier JA, Thouless ME. A  
513 novel subgroup of exogenous avian leukosis virus in chickens. *The Journal of general*  
514 *virology*. 1991;72 ( Pt 4):801-7.
- 515 2. Bai J, Payne LN, Skinner MA. HPRS-103 (exogenous avian leukosis virus,  
516 subgroup J) has an env gene related to those of endogenous elements EAV-0 and  
517 E51 and an E element found previously only in sarcoma viruses. *Journal of virology*.  
518 1995;69(2):779-84.
- 519 3. Dong X, Ju S, Zhao P, Li Y, Meng F, Sun P, et al. Synergetic effects of  
520 subgroup J avian leukosis virus and reticuloendotheliosis virus co-infection on growth  
521 retardation and immunosuppression in SPF chickens. *Veterinary microbiology*.  
522 2014;172(3-4):425-31.
- 523 4. Hui-jun, Hong-mei, CHENG, Zi-qiang, Jian-zhu, Zhi-zhong. Influence of REV



- 524 and ALV-J Co-Infection on Immunologic Function of T Lymphocytes and  
525 Histopathology in Broiler Chickens. *Journal of Integrative Agriculture*.  
526 2010;09(11):1667-76.
- 527 5. Cui Z, Sun S, Zhang Z, Meng S. Simultaneous endemic infections with  
528 subgroup J avian leukosis virus and reticuloendotheliosis virus in commercial and  
529 local breeds of chickens. *Avian pathology : journal of the WVPA*. 2009;38(6):443-8.
- 530 6. Davidson I, Borenstein R. Multiple infection of chickens and turkeys with avian  
531 oncogenic viruses: prevalence and molecular analysis. *Acta virologica*. 1999;43(2-  
532 3):136-42.
- 533 7. Cheng Z, Zhang H, Wang G, Liu Q, Liu J, Guo H, et al. Investigations of Avian  
534 Leukosis Virus Subgroup J and Reticuloendotheliosis Virus Infections in Broiler  
535 Breeders in China. *Israel Journal of Veterinary Medicine*. 2011;66(2):34-8.
- 536 8. Mascia T, Gallitelli D. Synergies and antagonisms in virus interactions. *Plant*  
537 *science : an international journal of experimental plant biology*. 2016;252:176-92.
- 538 9. Zhou CJ, Zhang XY, Liu SY, Wang Y, Li DW, Yu JL, et al. Synergistic infection  
539 of BrYV and PEMV 2 increases the accumulations of both BrYV and BrYV-derived  
540 siRNAs in *Nicotiana benthamiana*. *Scientific reports*. 2017;7:45132.
- 541 10. Liberto MC, Zicca E, Pavia G, Quirino A, Marascio N, Torti C, et al. Virological  
542 Mechanisms in the Coinfection between HIV and HCV. *Mediators of inflammation*.  
543 2015;2015:320532.
- 544 11. Dittmer DP, Damania B. Kaposi sarcoma-associated herpesvirus:  
545 immunobiology, oncogenesis, and therapy. *The Journal of clinical investigation*.

- 546 2016;126(9):3165-75.
- 547 12. Piedade D, Azevedo-Pereira JM. The Role of microRNAs in the Pathogenesis  
548 of Herpesvirus Infection. *Viruses*. 2016;8(6).
- 549 13. De Paoli P, Carbone A. Microenvironmental abnormalities induced by viral  
550 cooperation: Impact on lymphomagenesis. *Seminars in cancer biology*. 2015;34:70-  
551 80.
- 552 14. Abraham AG, D'Souza G, Jing Y, Gange SJ, Sterling TR, Silverberg MJ, et al.  
553 Invasive cervical cancer risk among HIV-infected women: a North American  
554 multicohort collaboration prospective study. *Journal of acquired immune deficiency  
555 syndromes (1999)*. 2013;62(4):405-13.
- 556 15. Guidry JT, Scott RS. The interaction between human papillomavirus and other  
557 viruses. *Virus research*. 2017;231:139-47.
- 558 16. Mercader M, Taddeo B, Panella JR, Chandran B, Nickoloff BJ, Foreman KE.  
559 Induction of HHV-8 lytic cycle replication by inflammatory cytokines produced by HIV-  
560 1-infected T cells. *The American journal of pathology*. 2000;156(6):1961-71.
- 561 17. Barillari G, Ensoli B. Angiogenic effects of extracellular human  
562 immunodeficiency virus type 1 Tat protein and its role in the pathogenesis of AIDS-  
563 associated Kaposi's sarcoma. *Clinical microbiology reviews*. 2002;15(2):310-26.
- 564 18. Yao S, Hu M, Hao T, Li W, Xue X, Xue M, et al. MiRNA-891a-5p mediates HIV-  
565 1 Tat and KSHV Orf-K1 synergistic induction of angiogenesis by activating NF-  
566 kappaB signaling. *Nucleic acids research*. 2015;43(19):9362-78.
- 567 19. Khan KA, Abbas W, Varin A, Kumar A, Di Martino V, Dichamp I, et al. HIV-1

- 568 Nef interacts with HCV Core, recruits TRAF2, TRAF5 and TRAF6, and stimulates  
569 HIV-1 replication in macrophages. *Journal of innate immunity*. 2013;5(6):639-56.
- 570 20. Birdwell CE, Queen KJ, Kilgore PC, Rollyson P, Trutschl M, Cvek U, et al.  
571 Genome-wide DNA methylation as an epigenetic consequence of Epstein-Barr virus  
572 infection of immortalized keratinocytes. *Journal of virology*. 2014;88(19):11442-58.
- 573 21. Queen KJ, Shi M, Zhang F, Cvek U, Scott RS. Epstein-Barr virus-induced  
574 epigenetic alterations following transient infection. *International journal of cancer*.  
575 2013;132(9):2076-86.
- 576 22. Schlums H, Cichocki F, Tesi B, Theorell J, Beziat V, Holmes TD, et al.  
577 Cytomegalovirus infection drives adaptive epigenetic diversification of NK cells with  
578 altered signaling and effector function. *Immunity*. 2015;42(3):443-56.
- 579 23. Minarovits J, Demcsak A, Banati F, Niller HH. Epigenetic Dysregulation in  
580 Virus-Associated Neoplasms. *Advances in experimental medicine and biology*.  
581 2016;879:71-90.
- 582 24. Cavignac Y, Esclatine A. Herpesviruses and autophagy: catch me if you can!  
583 *Viruses*. 2010;2(1):314-33.
- 584 25. Castanier C, Arnoult D. Mitochondrial localization of viral proteins as a means  
585 to subvert host defense. *Biochimica et biophysica acta*. 2011;1813(4):575-83.
- 586 26. D'Souza V, Summers MF. How retroviruses select their genomes. *Nature*  
587 *reviews Microbiology*. 2005;3(8):643-55.
- 588 27. Muriaux D, Mirro J, Nagashima K, Harvin D, Rein A. Murine leukemia virus  
589 nucleocapsid mutant particles lacking viral RNA encapsidate ribosomes. *Journal of*

- 590 virology. 2002;76(22):11405-13.
- 591 28. Gilmore TD, Temin HM. Different localization of the product of the v-rel  
592 oncogene in chicken fibroblasts and spleen cells correlates with transformation by  
593 REV-T. Cell. 1986;44(5):791-800.
- 594 29. O'Rear JJ, Mizutani S, Hoffman G, Fiandt M, Temin HM. Infectious and  
595 noninfectious recombinant clones of the provirus of SNV differ in cellular DNA and are  
596 apparently the same in viral DNA. Cell. 1980;20(2):423-30.
- 597 30. Hayward WS, Neel BG, Astrin SM. Activation of a cellular onc gene by  
598 promoter insertion in ALV-induced lymphoid leukosis. Nature. 1981;290(5806):475-  
599 80.
- 600 31. Cooper GM, Silverman L. Linkage of the endogenous avian leukosis virus  
601 genome of virus-producing chicken cells to inhibitory cellular DNA sequences. Cell.  
602 1978;15(2):573-7.
- 603 32. Niewiadomska AM, Gifford RJ. The extraordinary evolutionary history of the  
604 reticuloendotheliosis viruses. PLoS biology. 2013;11(8):e1001642.
- 605 33. Etienne L, Emerman M. The mongoose, the pheasant, the pox, and the  
606 retrovirus. PLoS biology. 2013;11(8):e1001641.
- 607 34. Ghosh S, Hayden MS. New regulators of NF-kappaB in inflammation. Nature  
608 reviews Immunology. 2008;8(11):837-48.
- 609 35. Havard L, Delvenne P, Frare P, Boniver J, Giannini SL. Differential production  
610 of cytokines and activation of NF-kappaB in HPV-transformed keratinocytes. Virology.  
611 2002;298(2):271-85.

- 612 36. Vogt PK. Retroviral oncogenes: a historical primer. *Nature reviews Cancer*.  
613 2012;12(9):639-48.
- 614 37. Schubach W, Groudine M. Alteration of c-myc chromatin structure by avian  
615 leukemia virus integration. *Nature*. 1984;307(5953):702-8.
- 616 38. Fung YK, Lewis WG, Crittenden LB, Kung HJ. Activation of the cellular  
617 oncogene c-erbB by LTR insertion: molecular basis for induction of erythroblastosis  
618 by avian leukemia virus. *Cell*. 1983;33(2):357-68.
- 619 39. Neel BG, Hayward WS, Robinson HL, Fang J, Astrin SM. Avian leukemia virus-  
620 induced tumors have common proviral integration sites and synthesize discrete new  
621 RNAs: oncogenesis by promoter insertion. *Cell*. 1981;23(2):323-34.
- 622 40. Shostak K, Chariot A. EGFR and NF-kappaB: partners in cancer. *Trends in*  
623 *molecular medicine*. 2015;21(6):385-93.
- 624 41. Evensen NA, Kuscu C, Nguyen HL, Zarrabi K, Dufour A, Kadam P, et al.  
625 Unraveling the role of KIAA1199, a novel endoplasmic reticulum protein, in cancer  
626 cell migration. *Journal of the National Cancer Institute*. 2013;105(18):1402-16.
- 627 42. Selbach M, Schwanhaussner B, Thierfelder N, Fang Z, Khanin R, Rajewsky N.  
628 Widespread changes in protein synthesis induced by microRNAs. *Nature*.  
629 2008;455(7209):58-63.
- 630 43. Baek D, Villen J, Shin C, Camargo FD, Gygi SP, Bartel DP. The impact of  
631 microRNAs on protein output. *Nature*. 2008;455(7209):64-71.
- 632 44. Xue M, Yao S, Hu M, Li W, Hao T, Zhou F, et al. HIV-1 Nef and KSHV  
633 oncogene K1 synergistically promote angiogenesis by inducing cellular miR-718 to

- 634 regulate the PTEN/AKT/mTOR signaling pathway. *Nucleic acids research*.  
635 2014;42(15):9862-79.
- 636 45. Liu G, Friggeri A, Yang Y, Park YJ, Tsuruta Y, Abraham E. miR-147, a  
637 microRNA that is induced upon Toll-like receptor stimulation, regulates murine  
638 macrophage inflammatory responses. *Proceedings of the National Academy of*  
639 *Sciences of the United States of America*. 2009;106(37):15819-24.
- 640 46. Uhlmann S, Mannsperger H, Zhang JD, Horvat EA, Schmidt C, Kublbeck M, et  
641 al. Global microRNA level regulation of EGFR-driven cell-cycle protein network in  
642 breast cancer. *Molecular systems biology*. 2012;8:570.
- 643 47. Shostak K, Zhang X, Hubert P, Goktuna SI, Jiang Z, Klevernic I, et al. NF-  
644 kappaB-induced KIAA1199 promotes survival through EGFR signalling. *Nature*  
645 *communications*. 2014;5:5232.
- 646 48. Tiwari A, Schneider M, Fiorino A, Haider R, Okoniewski MJ, Roschitzki B, et al.  
647 Early insights into the function of KIAA1199, a markedly overexpressed protein in  
648 human colorectal tumors. *PloS one*. 2013;8(7):e69473.
- 649 49. Birkenkamp-Demtroder K, Maghnouj A, Mansilla F, Thorsen K, Andersen CL,  
650 Oster B, et al. Repression of KIAA1199 attenuates Wnt-signalling and decreases the  
651 proliferation of colon cancer cells. *British journal of cancer*. 2011;105(4):552-61.
- 652 50. Sabates-Bellver J, Van der Flier LG, de Palo M, Cattaneo E, Maake C,  
653 Rehrauer H, et al. Transcriptome profile of human colorectal adenomas. *Molecular*  
654 *cancer research : MCR*. 2007;5(12):1263-75.
- 655 51. Matsuzaki S, Tanaka F, Mimori K, Tahara K, Inoue H, Mori M.

- 656 Clinicopathologic significance of KIAA1199 overexpression in human gastric cancer.  
657 *Annals of surgical oncology*. 2009;16(7):2042-51.
- 658 52. Gilmore TD. Role of rel family genes in normal and malignant lymphoid cell  
659 growth. *Cancer surveys*. 1992;15:69-87.
- 660 53. Liou HC, Hsia CY. Distinctions between c-Rel and other NF-kappaB proteins in  
661 immunity and disease. *BioEssays : news and reviews in molecular, cellular and*  
662 *developmental biology*. 2003;25(8):767-80.
- 663 54. Gao Y, Zhang Y, Yao Y, Guan X, Liu Y, Qi X, et al. Avian leukosis virus  
664 subgroup J induces VEGF expression via NF-kappaB/PI3K-dependent IL-6  
665 production. *Oncotarget*. 2016;7(49):80275-87.
- 666 55. Gamett DC, Tracy SE, Robinson HL. Differences in sequences encoding the  
667 carboxyl-terminal domain of the epidermal growth factor receptor correlate with  
668 differences in the disease potential of viral erbB genes. *Proceedings of the National*  
669 *Academy of Sciences of the United States of America*. 1986;83(16):6053-7.
- 670 56. Nilsen TW, Maroney PA, Goodwin RG, Rottman FM, Crittenden LB, Raines  
671 MA, et al. c-erbB activation in ALV-induced erythroblastosis: novel RNA processing  
672 and promoter insertion result in expression of an amino-truncated EGF receptor. *Cell*.  
673 1985;41(3):719-26.
- 674 57. Sasaki CT, Issaeva N, Vageli DP. In vitro model for gastroduodenal reflux-  
675 induced nuclear factor-kappaB activation and its role in hypopharyngeal  
676 carcinogenesis. *Head & neck*. 2016;38 Suppl 1:E1381-91.
- 677 58. Nottingham LK, Yan CH, Yang X, Si H, Coupar J, Bian Y, et al. Aberrant

- 678 IKK $\alpha$  and IKK $\beta$  cooperatively activate NF- $\kappa$ B and induce EGFR/AP1  
679 signaling to promote survival and migration of head and neck cancer. *Oncogene*.  
680 2014;33(9):1135-47.
- 681 59. Kuscu C, Evensen N, Kim D, Hu YJ, Zucker S, Cao J. Transcriptional and  
682 epigenetic regulation of KIAA1199 gene expression in human breast cancer. *PLoS*  
683 *one*. 2012;7(9):e44661.
- 684 60. Nottingham LK, Yan CH, Yang X, Si H, Coupar J, Bian Y, et al. Aberrant IKK $\alpha$   
685 and IKK $\beta$  cooperatively activate NF- $\kappa$ B and induce EGFR/AP1 signaling to promote  
686 survival and migration of head and neck cancer. *Oncogene*. 2014;33(9):1135-47.
- 687 61. Ranade AR, Cherba D, Sridhar S, Richardson P, Webb C, Paripati A, et al.  
688 MicroRNA 92a-2\*: a biomarker predictive for chemoresistance and prognostic for  
689 survival in patients with small cell lung cancer. *Journal of thoracic oncology : official*  
690 *publication of the International Association for the Study of Lung Cancer*.  
691 2010;5(8):1273-8.
- 692 62. Zhang Y, Zhang HE, Liu Z. MicroRNA-147 suppresses proliferation, invasion  
693 and migration through the AKT/mTOR signaling pathway in breast cancer. *Oncology*  
694 *letters*. 2016;11(1):405-10.
- 695 63. Wang X, Zhou D, Wang G, Huang L, Zheng Q, Li C, et al. A novel multi-variant  
696 epitope ensemble vaccine against avian leukosis virus subgroup J. *Vaccine*.  
697 2017;35(48).
- 698 64. Hou M, Zhou D, Li G, Guo H, Liu J, Wang G, et al. Identification of a variant  
699 antigenic neutralizing epitope in hypervariable region 1 of avian leukosis virus



700 subgroup J. Vaccine. 2016;34(11):1399-404.

701 65. Wang Y, Wang G, Wang Z, Zhang H, Zhang L, Cheng Z. Chicken biliary

702 exosomes enhance CD4(+)T proliferation and inhibit ALV-J replication in liver.

703 Biochemistry and cell biology = Biochimie et biologie cellulaire. 2014;92(2):145-51.

704

706 **Figure legends**

707 **Fig 1. Co-infection of ALV-J and REV promotes the viral replication and cell**  
708 **survival in CEFs.**

709 (A) The two viral particles of ALV-J and REV were observed in the same cell by  
710 electron microscopy. (B) ALV-J increased REV RNA level at 24hpi, 48hpi, 72hpi and  
711 96hpi. Data represent mean  $\pm$  SEM determined from three independent experiments  
712 (n = 3), each experiment containing three technical replicates. (C) ALV-J RNA level  
713 was not changed significantly in intracellular co-infected ALV-J and REV at 24hpi,  
714 48hpi, 72hpi and 96hpi. Data represent mean  $\pm$  SEM determined from three  
715 independent experiments (n = 3), each experiment containing three technical  
716 replicates. (D) Co-infection of ALV-J and REV enhanced the viral proteins expression  
717 in intracellular. Protein expression of ALV-J (gag) and REV (env) by confocal in  
718 intracellular at 24hpi, 48hpi, 72hpi and 96hpi. (E) Co-infection of ALV-J and REV  
719 promoted CEFs survival. The CEFs were infected ALV-J, REV or both and further  
720 examined with CCK-8 assay on day 1, 2, 3, 4, 5, 6, 7,8 and 9 pi. Data represent mean  
721  $\pm$  SEM determined from three independent experiments (n = 6), each experiment  
722 containing three technical replicates.

723

724 **Fig 2. Co-infection of ALV-J and REV promoted the pathogenicity and**  
725 **tumorigenesis in chickens.**

726 (A) ALV-J synergized REV to decrease the weights of co-infected chickens. (B) ALV-  
727 J and REV synergistically promoted the pathogenicity in livers, kidneys, thymus and

728 pancreas of chickens at 60 dpi. (C) REV increased ALV-J RNA level in liver, kidney,  
729 bone marrow, bursa of Fabricius and heart of chickens at 60 dpi. Data represent  
730 mean  $\pm$  SEM determined from three independent experiments (n = 6), each  
731 experiment containing three technical replicates. Compared with single-infection  
732 group: \*P < 0.05 and \*\*P < 0.01. (D) ALV-J enhanced REV RNA level in liver, kidney,  
733 bone marrow, bursa of Fabricius and heart of chickens at 60 dpi. Data represent  
734 mean  $\pm$  SEM determined from three independent experiments (n = 6), each  
735 experiment containing three technical replicates. Compared with single-infection  
736 group: \*P < 0.05 and \*\*P < 0.01. (E) Some additional white nodules were observed in  
737 endocardium of co-infection group. H&E staining results showed these white  
738 endocardial nodules were fibroma.

739

740 **Fig 3. ALV-J synergized with REV to activate KIAA1199 and inhibit miR-147 in**  
741 **CEFs.**

742 (A) The iTRAQ quantitative proteomic analysis of infected CEF at 72hpi. There were  
743 33 differentially expressed proteins between co-infection and single infection. (B)  
744 ALV-J and REV synergistically enhanced the KIAA1199 RNA level in infected DF-1  
745 cells at 72hpi. Data represent mean  $\pm$  SEM determined from three independent  
746 experiments (n = 3), each experiment containing three technical replicates. (C) ALV-J  
747 synergized with REV to enhance the KIAA1199 protein level in DF-1 cells at 72hpi  
748 detected by western blot with anti-KIAA1199 antibody. (D) MiR-147 was the only  
749 downregulated miRNA in co-infection group. (E) ALV-J synergized with REV to inhibit

750 the miR-147 RNA level in DF-1 cells at 72hpi. Data represent mean  $\pm$  SEM  
751 determined from three independent experiments (n = 3), each experiment containing  
752 three technical replicates.

753

754 **Fig 4. ALV-J synergized with REV to activate KIAA1199 and inhibit miR-147 in**  
755 **infected chicken.**

756 (A) ALV-J and REV synergistically enhanced the KIAA1199 RNA level in liver, kidney,  
757 bone marrow, bursa of Fabricius and heart of chicken at 60 dpi. Data represent mean  
758  $\pm$  SEM determined from three independent experiments (n = 6), each experiment  
759 containing three technical replicates. Compared with single-infection group: \*P < 0.05  
760 and \*\*P < 0.01. (B) ALV-J synergized with REV to enhance the protein expression of  
761 KIAA1199 in kidney, heart and bone marrow in chicken at 60 dpi detected by  
762 immunohistochemical analysis with anti-KIAA1199 antibody. (C) Quantification of the  
763 results in (B). Compared with single-infection group: \*P < 0.05 and \*\*P < 0.01. (D) Co-  
764 infection of ALV-J and REV promoted the expression of KIAA1199 in fibroma of  
765 endocardium detected by immunohistochemical analysis with anti-KIAA1199  
766 antibody. (E) The miR-147 expression was inhibited by co-infection of ALV-J and  
767 REV in kidney, bone marrow and heart, while that was increased in liver and bursa of  
768 Fabricius in chicken at 60 dpi. Data represent mean  $\pm$  SEM determined from three  
769 independent experiments (n = 6), each experiment containing three technical  
770 replicates. Compared with single-infection group: \*P < 0.05 and \*\*P < 0.01.

771

772 **Fig 5. ALV-J and REV synergistically activated NF- $\kappa$ B and EGFR signaling.**

773 (A) Co-infection of ALV-J and REV increased the NF- $\kappa$ B p65 RNA level in DF-1 cells  
774 at 72hpi. Data represent mean  $\pm$  SEM determined from three independent  
775 experiments (n = 3), each experiment containing three technical replicates. (B) ALV-J  
776 synergized with REV to promote the NF- $\kappa$ B p50 RNA level in DF-1 cells at 72 hpi.  
777 Data represent mean  $\pm$  SEM determined from three independent experiments (n = 3),  
778 each experiment containing three technical replicates. (C) ALV-J synergized with  
779 REV to enhance the NF- $\kappa$ B p50 and phosphor-NF- $\kappa$ B p65 expression in DF-1 cells at  
780 72hpi detected by western blot with anti-p50 and anti-phospho-p65 antibody. (D)  
781 ALV-J and REV synergistically enhanced the chicken NF- $\kappa$ B p65 protein level in DF-1  
782 cells at 72hpi detected by Chicken NF- $\kappa$ B p65 ELISA kit. Competitive oligonucleotide  
783 was used as a positive control. Data represent mean  $\pm$  SEM determined from three  
784 independent experiments (n=3), each experiment containing three technical  
785 replicates. (E) ALV-J synergized with REV to enhance EGFR RNA level in DF-1 cells  
786 at 72hpi. Data represent mean  $\pm$  SEM determined from three independent  
787 experiments (n=3), each experiment containing three technical replicates. (F) ALV-J  
788 and REV synergistically enhanced the chicken P-I $\kappa$ B $\alpha$  expression in liver, kidney,  
789 bone marrow, bursa of Fabricius and heart in chicken at 60 dpi detected by Chicken  
790 NF- $\kappa$ B P-I $\kappa$ B $\alpha$  ELISA kit. Data represent mean  $\pm$  SEM determined from three  
791 independent experiments (n=6), each experiment containing three technical  
792 replicates. Compared with single-infection group: \*P < 0.05 and \*\*P < 0.01. (G) ALV-J

793 synergized with REV to increase the EGFR RNA level in liver, kidney, bone marrow,  
794 bursa of Fabricius and heart in chicken at 60 dpi. Data represent mean  $\pm$  SEM  
795 determined from three independent experiments (n=6), each experiment containing  
796 three technical replicates. Compared with single-infection group: \*P < 0.05 and \*\*P <  
797 0.01.

798

799 **Fig 6. The KIAA1199 was activated by NF- $\kappa$ B and EGFR signaling during ALV-J**  
800 **and REV infection.**

801 (A) The RNA levels of NF- $\kappa$ B p65, KIAA1199 and EGFR were suppressed by  
802 incubating NF- $\kappa$ B p65 shRNA at 48hpi. Data represent mean  $\pm$  SEM determined from  
803 three independent experiments (n=3), each experiment containing three technical  
804 replicates. (B) The chicken NF- $\kappa$ B p65 protein level was inhibited by NF- $\kappa$ B p65  
805 shRNA detected by Chicken NF- $\kappa$ B p65 ELISA kit. Data represent mean  $\pm$  SEM  
806 determined from three independent experiments (n = 3), each experiment containing  
807 three technical replicates. (C) The protein expression of KIAA1199 was decreased by  
808 NF- $\kappa$ B p65 shRNA at 48hpt detected by western blot with anti-KIAA1199 antibody.  
809 (D) The RNA level of KIAA1199, NF- $\kappa$ B p65 and EGFR were suppressed by  
810 KIAA1199 shRNA. Data represent mean  $\pm$  SEM determined from three independent  
811 experiments (n = 3), each experiment containing three technical replicates. (E) The  
812 protein expression of KIAA1199 was decreased by KIAA1199 shRNA at 48h pt  
813 detected by western blot with anti-KIAA1199 antibody. (F) The protein level of  
814 chicken NF- $\kappa$ B p65 was inhibited by KIAA1199 shRNA detected by Chicken NF- $\kappa$ B

815 p65 ELISA kit. Data represent mean  $\pm$  SEM determined from three independent  
816 experiments (n = 3), each experiment containing three technical replicates.

817

818 **Fig 7. Cellular miR-147 regulated NF- $\kappa$ B p50 and KIAA1199 by targeting 3'UTR.**

819 (A) MiR-147 inhibited the reporter activity of the pmirGLO-KIAA1199 3'UTR. MiR-147  
820 mimics (40 nM) or negative control was co-transfected with pmirGLO-Control or  
821 pmirGLO-KIAA1199 3'UTR reporter plasmid into 293T cells. (B) MiR-147 mimics (10,  
822 20 and 40 nM) or a negative control was co-transfected along with pmir-GL0-  
823 KIAA1199 3'UTR reporter plasmid into 293T cells. (C) MiR-147 inhibited expressions  
824 of KIAA1199 and NF- $\kappa$ B p50 in a dose-dependent manner. MiR-147 mimics (20 and  
825 40 nM) were transfected into ALV-J and REV co-infected CEF, western blot was  
826 performed with anti-KIAA1199 antibody or anti- NF- $\kappa$ B p50 antibody at 48 h post-  
827 transfection. (D) Inhibition of miR-147 promoted expression of KIAA1199 and NF- $\kappa$ B  
828 p50. MiR-147 inhibitors (30 and 60 nM) were transfected into CEF and western  
829 blotting was performed with anti-KIAA1199 or anti- NF- $\kappa$ B p50 antibody at 48 h post-  
830 transfection. (E) Schematic diagram of predicted seed sequence of miR-147 which  
831 binds with KIAA1199 3'UTR. (F) KIAA1199 3'UTR wild type (WT KIAA1199) was co-  
832 transfected with a negative control (Neg. Ctrl.) or miR-147 into 293T cells, while  
833 mutant KIAA1199 3'UTR construct (mut KIAA1199) was also co-transfected with  
834 Neg. Ctrl. or miR-147. (G) Schematic diagram of predicted seed sequence of miR-  
835 147 which binds with NF- $\kappa$ B p50 3'UTR. (H) MiR-147 inhibited the reporter activity of  
836 the pmirGLO-NF- $\kappa$ B p50 3'UTR. MiR-147 mimics (40 nM) or negative control with

837 pmirGLO-Control or pmirGLO-NF- $\kappa$ B p50 3'UTR reporter plasmid were co-  
838 transfected into 293T cells. (I) MiR-147 mimics (10, 20 and 40 nM) or a negative  
839 control was co-transfected into 293T cells along with pmir-GLO-NF- $\kappa$ B p50 3'UTR  
840 reporter plasmid. (J) NF- $\kappa$ B p50 3'UTR wild type (WT KIAA1199) was co-transfected  
841 with a negative control (Neg. Ctrl.) or miR-147 into 293T cells, while mutant NF- $\kappa$ B  
842 p50 3'UTR construct (mut NF- $\kappa$ B p50) was also co-transfected with Neg. Ctrl. or miR-  
843 147. All above Luciferase assays were performed 48 h later, data represent the mean  
844  $\pm$  SEM from three independent experiments (n = 3), and each experiment containing  
845 three technical replicates. \*\*P < 0.01 by Student's t test versus the Neg. Ctrl. group.  
846 n.s., not significant.

847

848 **Fig 8. Diagram of molecular mechanism by which ALV-J and REV**  
849 **synergistically activate KIAA1199 and inhibit miR-147.**

850 In ALV-J and REV co-infected cells, ALV-J synergizes with REV to further promote  
851 the NF- $\kappa$ B pathway. As a result, p50 and p65 were enhanced, leading to drive  
852 KIAA1199 gene transcription. KIAA1199 also activate EGFR signaling to promote  
853 NF- $\kappa$ B pathway stability. MiR-147, as a key to NF- $\kappa$ B/KIAA1199/EGFR pathway  
854 crosstalk, regulated p50, KIAA1199 and EGFR-driven cell-cycle proteins by targeting  
855 their 3'UTR region sequences, respectively, to further active the oncogene  
856 KIAA1199.

857



858 **Table legends**

859 Table 1. The primer sequences of real-time PCR.

| Gene       | Primer sequences                                      | Product (bp) |
|------------|-------------------------------------------------------|--------------|
| ALV-J gp85 | F: TCGTGCGTGGTTATTATTTTC<br>R: AATGGTGAGGTCGCTGACTGT  | 144          |
| REV LTR    | F: TTGTTGAAGGCAAGCATCAG<br>R: GAGGATAGCATCTGCCCTTT    | 105          |
| KIAA1199   | F: GTCTCCATCCACCACACCTTCT<br>R: ACAAGCAGTCCAAGGCAGTGA | 161          |
| NF-κB p50  | F: AAGCAGGCAGAGGTGGTAGAA<br>R: TTGTCATCTCCTTCAGCAGCAG | 110          |
| NF-κB p65  | F: ACCACCACCACAACCACAATGC<br>R: AGCGGCGTCGATGGTATCAA  | 114          |
| EGFR       | F: TCAGTCGCCAGAAGGAGTGT<br>R: CCAGAGCAGGTTGTGTTGTATG  | 142          |
| GAPDH      | F: GAACATCATCCCAGCGTCCA<br>R: CGGCAGGTCAGGTCAACAAC    | 132          |
| U6         | F: CTCGCTTCGGCAGCACA<br>R: AACGCTTCACGAATTTGCGT       | 94           |

860

861

862

863

864

865

866

867

868

869

870 Table 2. Influence of REV and ALV-J single infection and co-infection on the non-  
871 specific death number in chickens.

| Group          | No. chickens | Inoculation dosage                                                         | Hatching rate(%) <sup>a</sup> | The non-specific death number |    |    |     |     |     |     |     |     |     |     |
|----------------|--------------|----------------------------------------------------------------------------|-------------------------------|-------------------------------|----|----|-----|-----|-----|-----|-----|-----|-----|-----|
|                |              |                                                                            |                               | 1d                            | 2d | 3d | 10d | 17d | 24d | 31d | 38d | 45d | 52d | 59d |
| Mock           | 30           | 200µl DMEM<br>100µl 10 <sup>3.8</sup>                                      | 100 <sup>A</sup>              | 0                             | 0  | 0  | 0   | 0   | 0   | 0   | 0   | 0   | 0   | 0   |
| ALV-J          | 30           | TCID50 ALV-J + 100µl<br>DMEM<br>100µl                                      | 72 <sup>B</sup>               | 1                             | 1  | 0  | 0   | 1   | 0   | 0   | 0   | 0   | 0   | 0   |
| REV            | 30           | 10 <sup>3.2</sup> TCID50<br>REV + 100µl<br>DMEM<br>100µl 10 <sup>3.8</sup> | 64 <sup>B</sup>               | 1                             | 0  | 0  | 0   | 0   | 0   | 0   | 0   | 0   | 0   | 0   |
| ALV-J<br>+ REV | 60           | TCID50 ALV-J + 100µl<br>10 <sup>3.2</sup> TCID50<br>REV                    | 22 <sup>C</sup>               | 2                             | 1  | 0  | 0   | 1   | 0   | 0   | 0   | 0   | 0   | 0   |

872 <sup>a</sup> Hatching rate (%) with different superscript letters differ significantly based upon x2 analysis (P <  
873 0.05)

874

**A**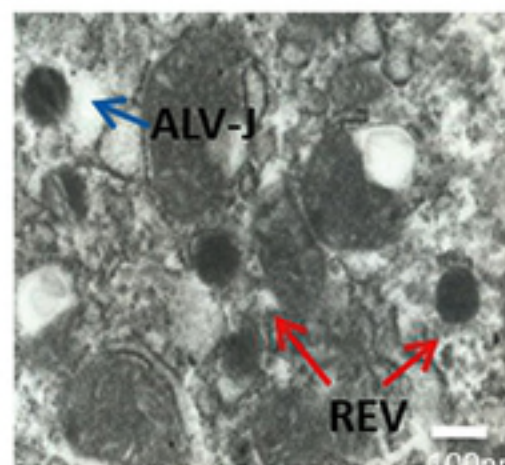**B**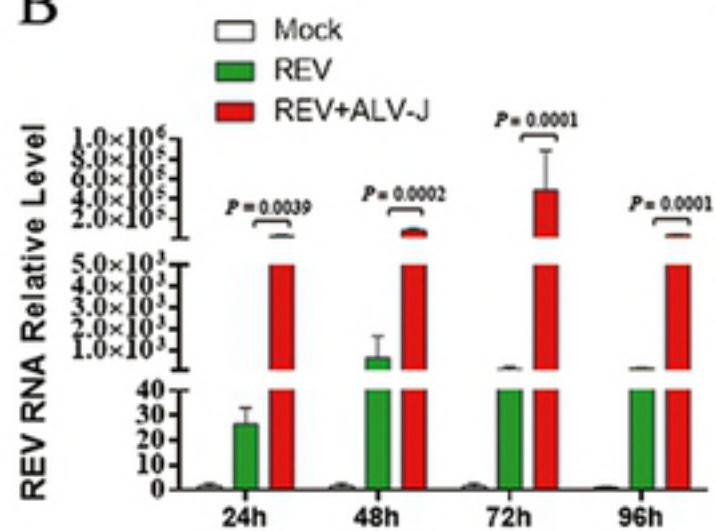**C**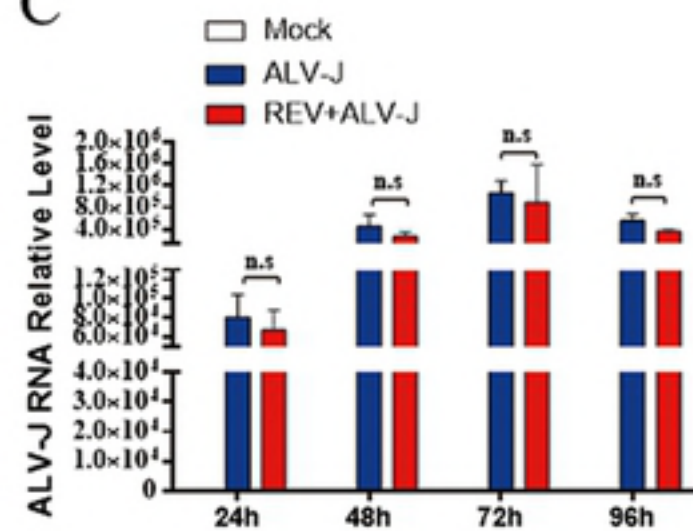**D**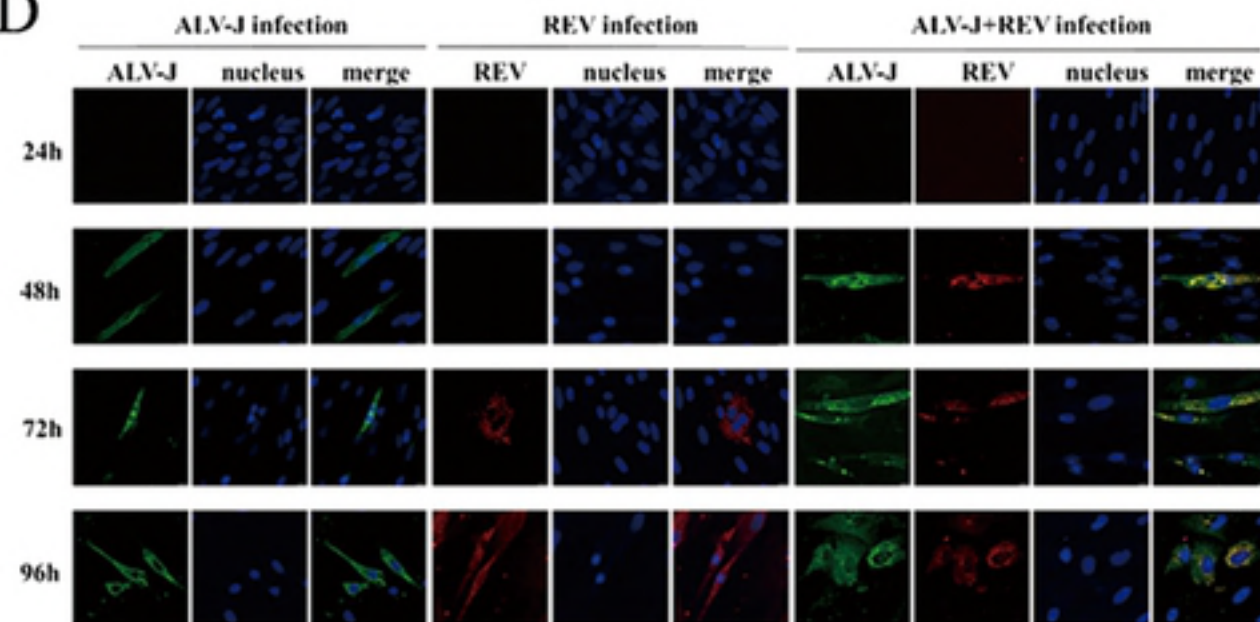**E**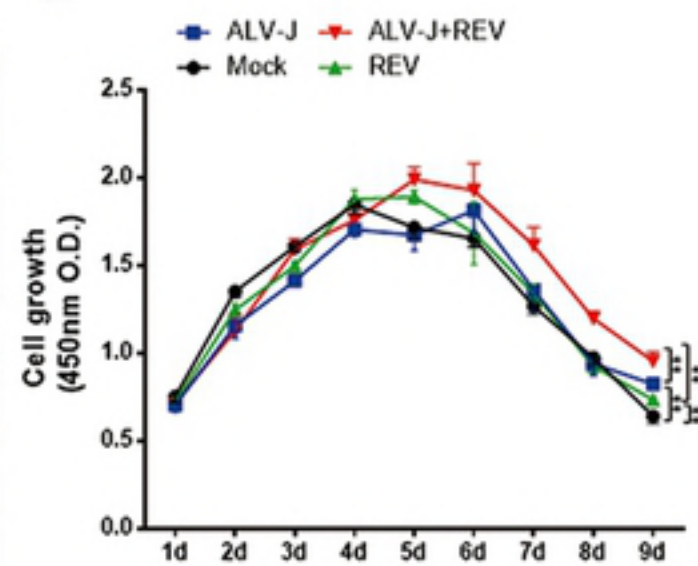



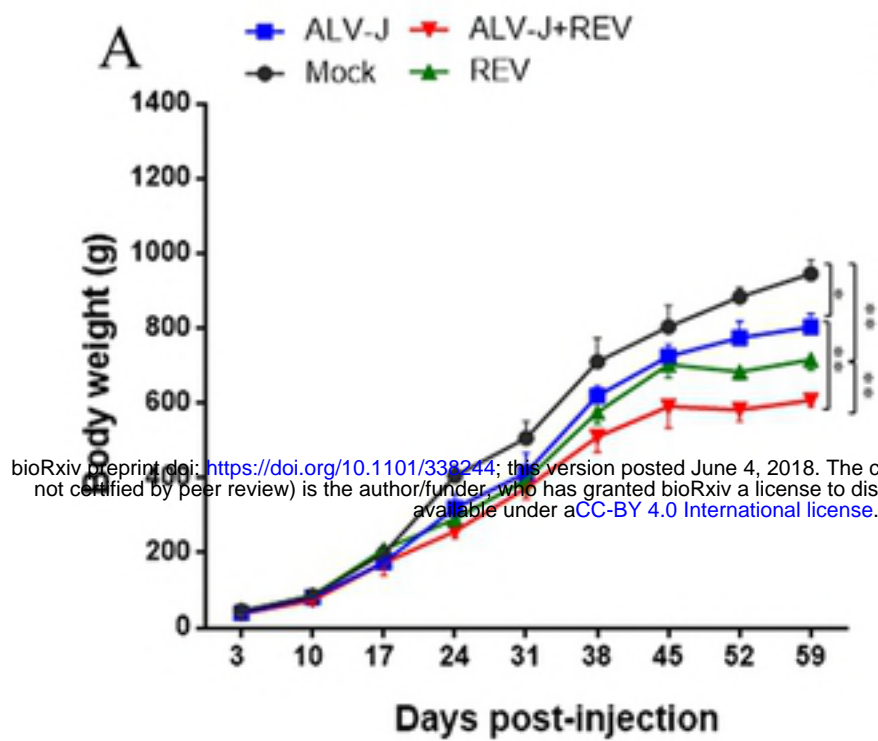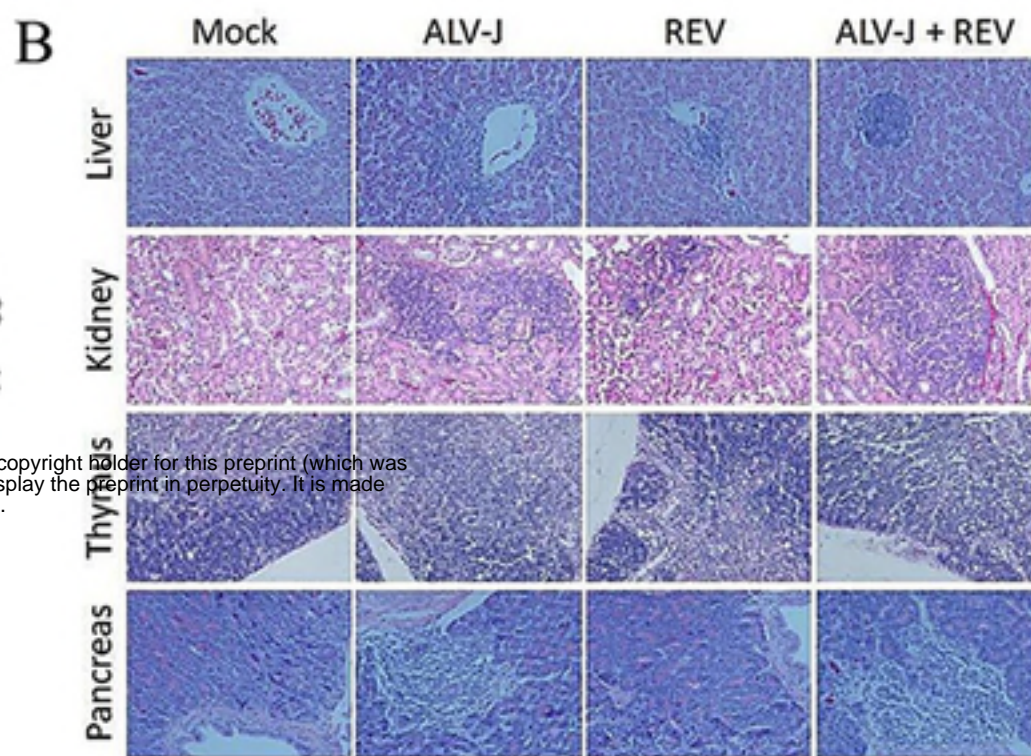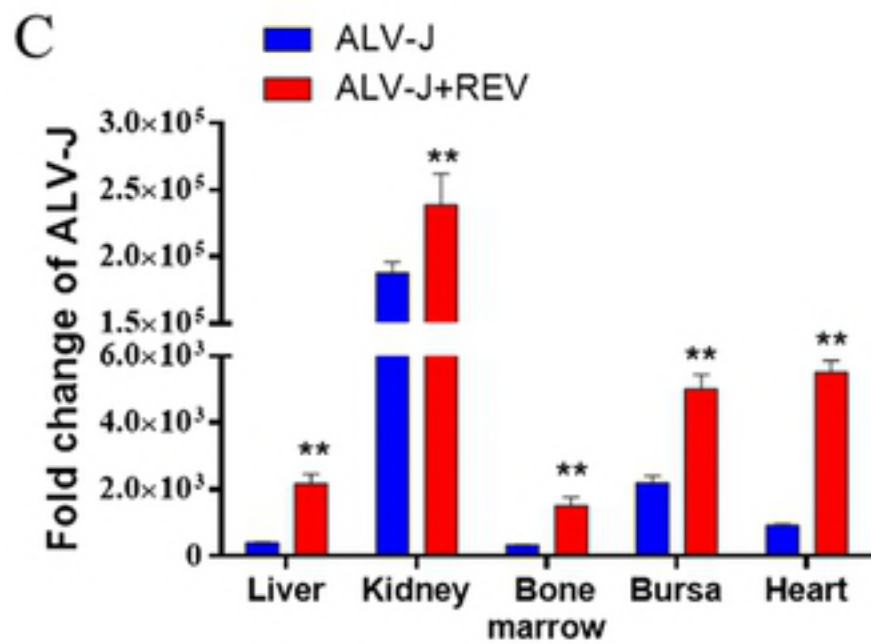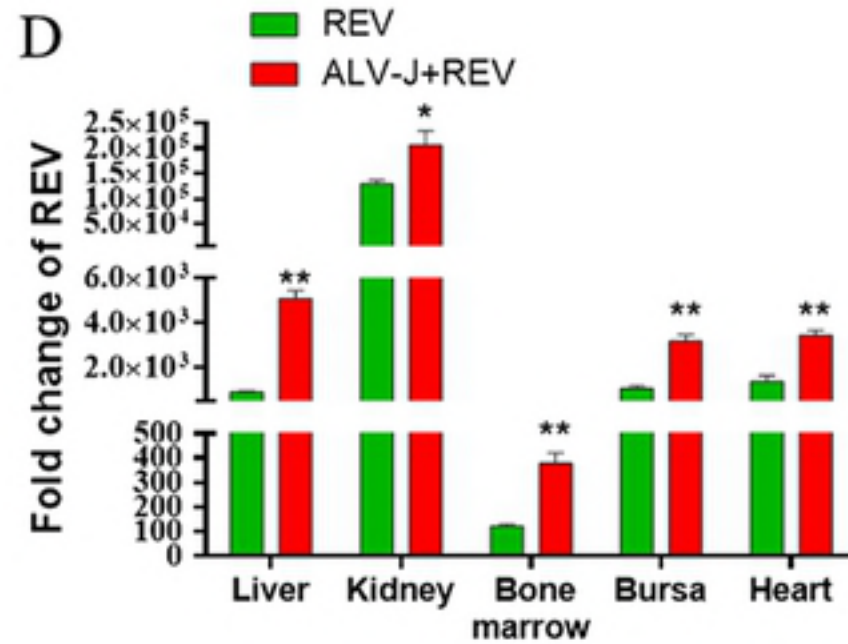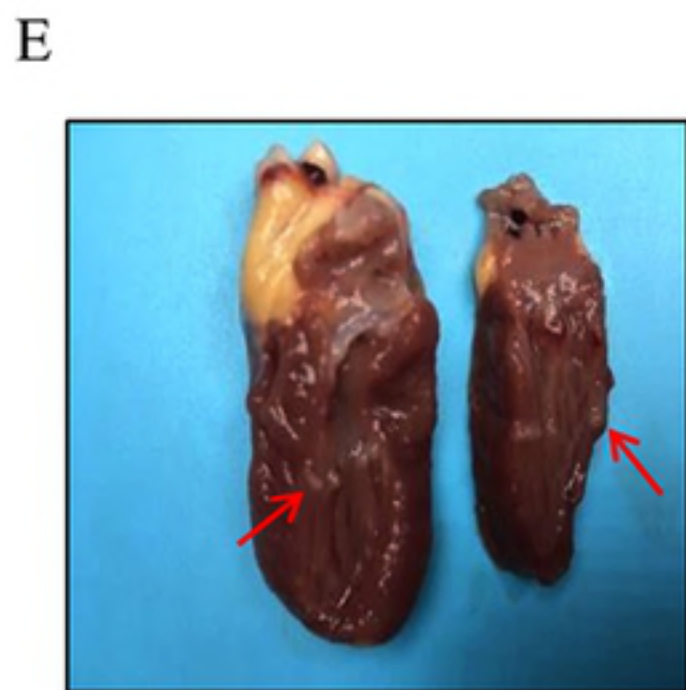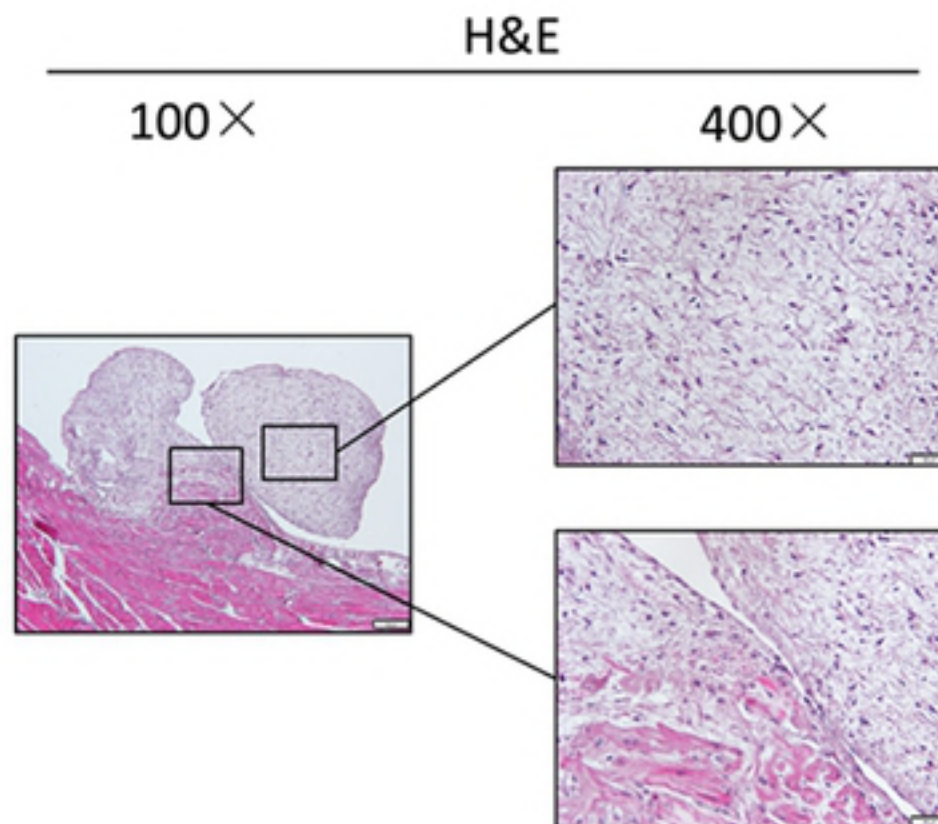

A

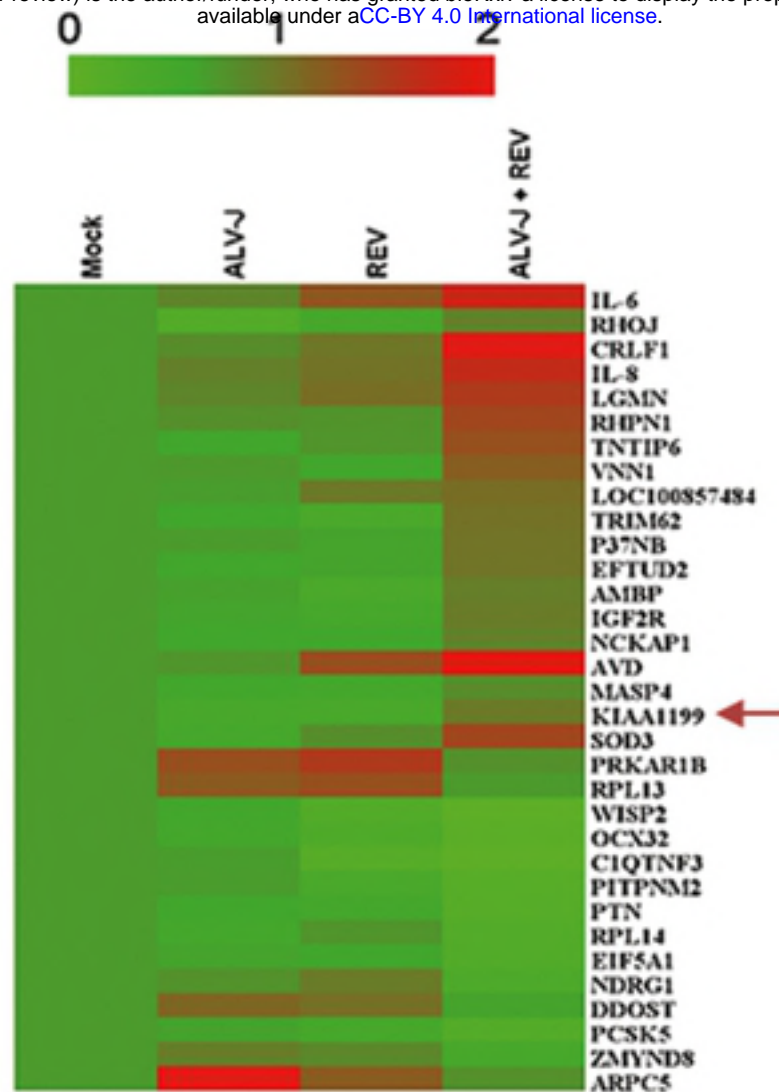

B

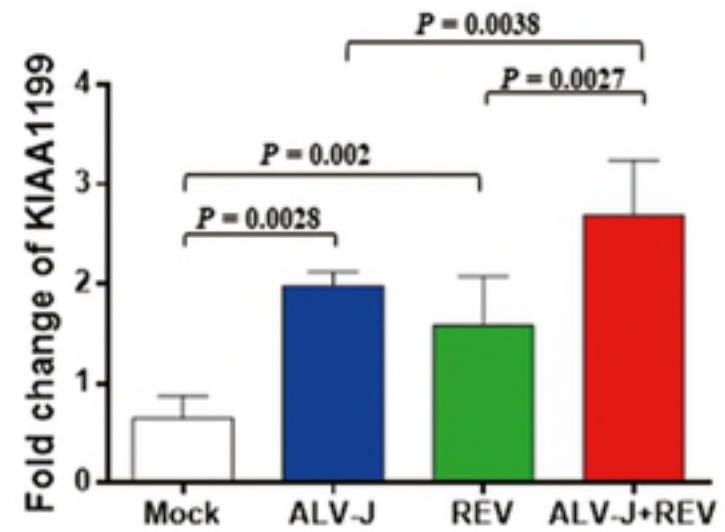

C

The expression of KIAA1199 in DF-1 intracellular at 72h infection

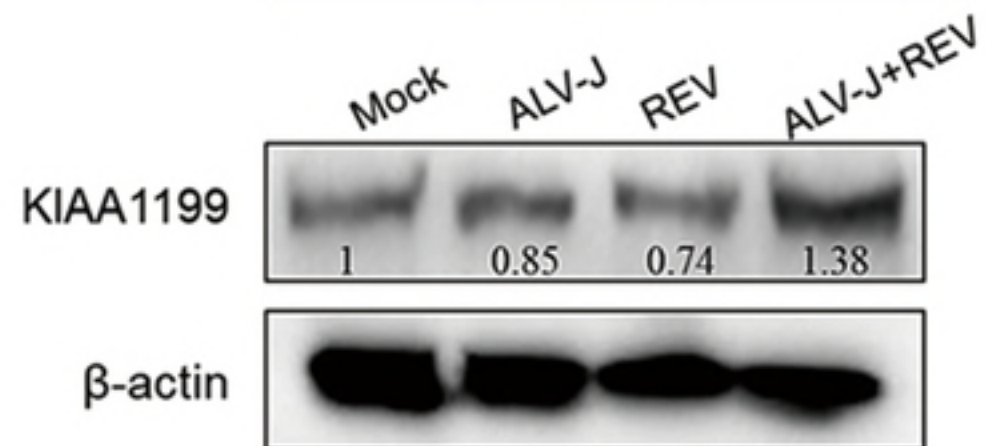

D

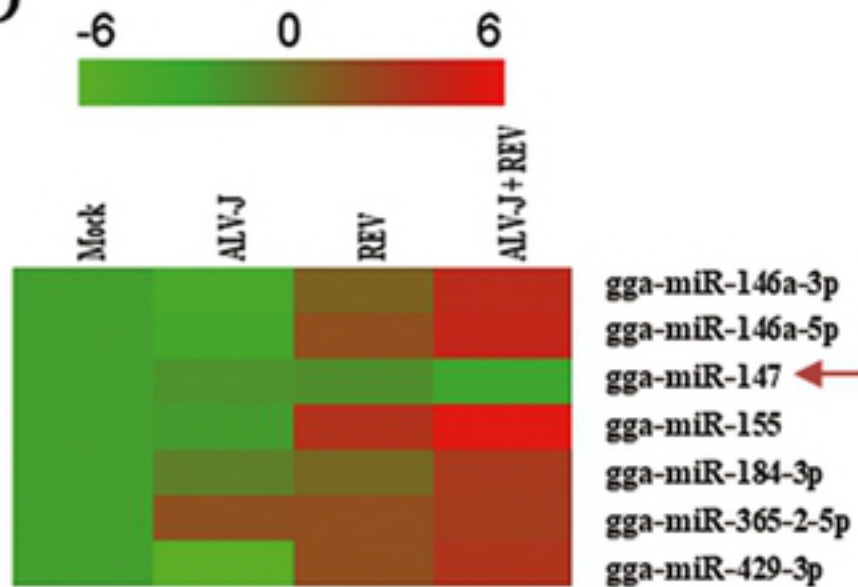

E

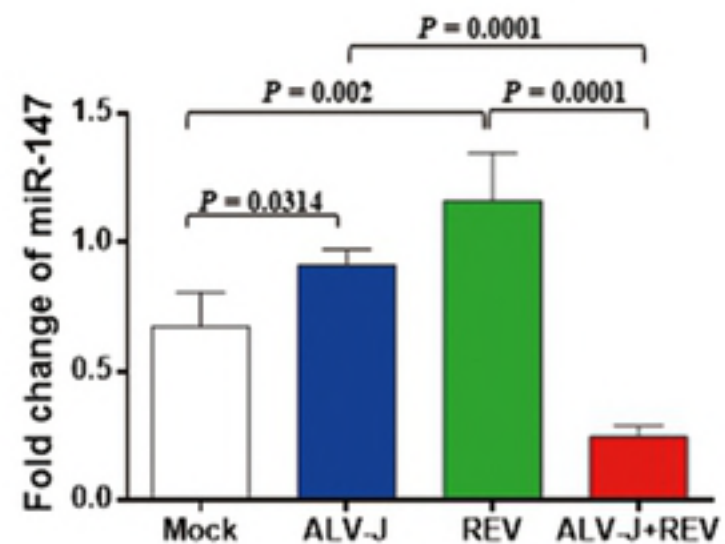



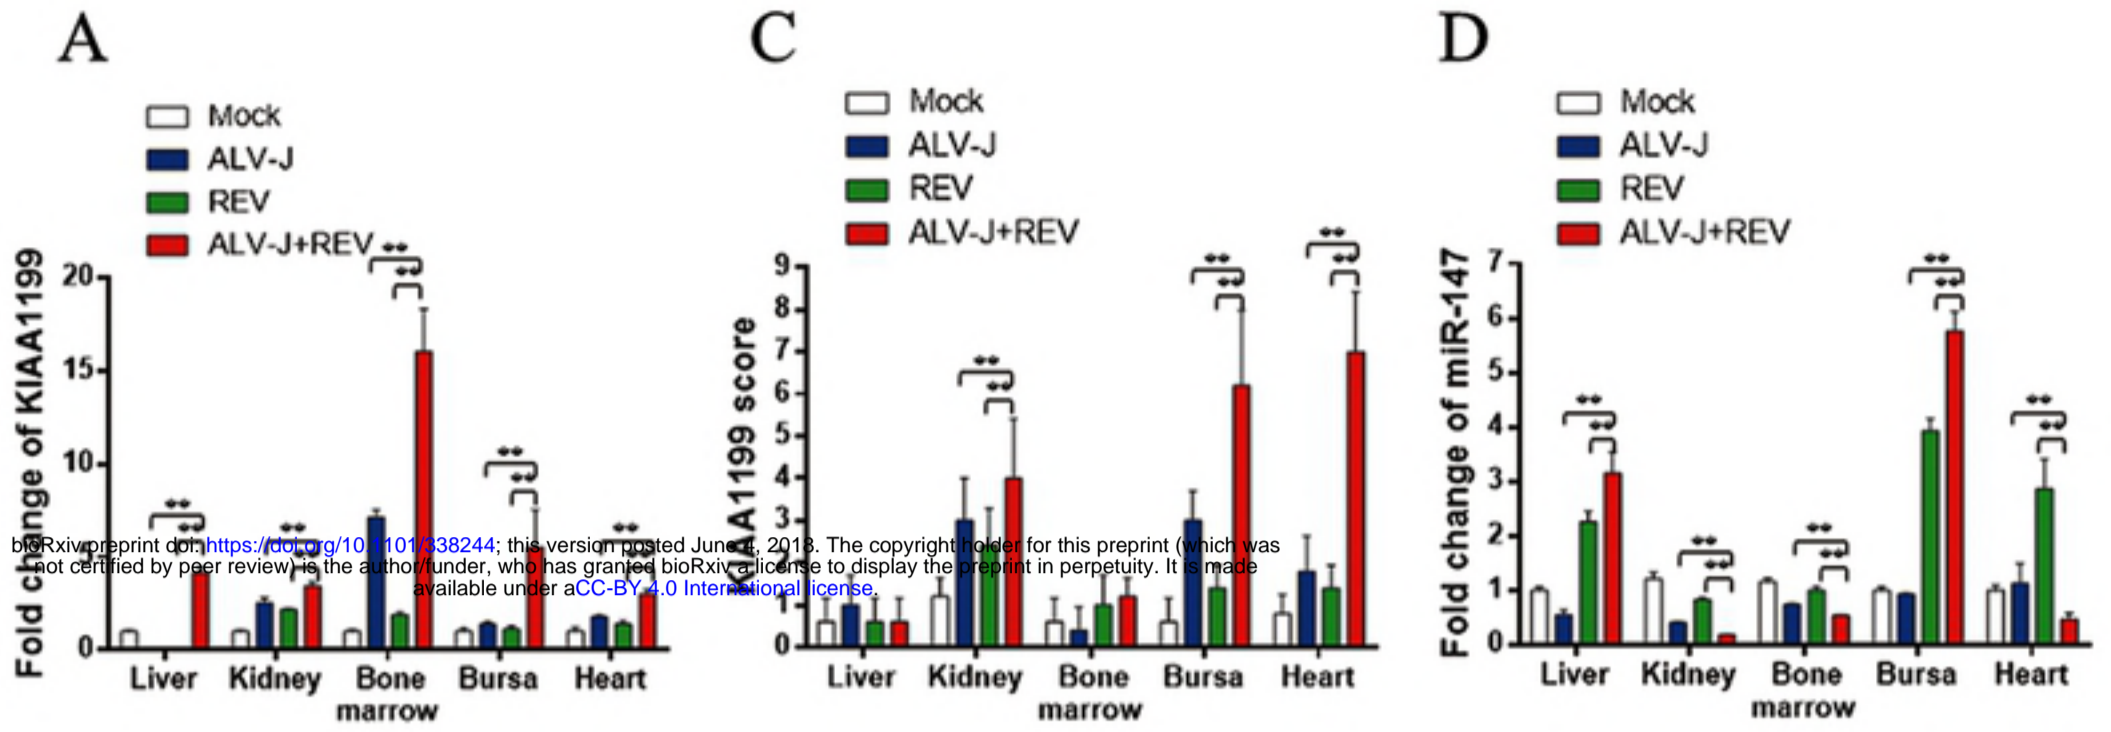

bioRxiv preprint doi: <https://doi.org/10.1101/338244>; this version posted June 4, 2018. The copyright holder for this preprint (which was not certified by peer review) is the author/funder, who has granted bioRxiv a license to display the preprint in perpetuity. It is made available under aCC-BY 4.0 International license.

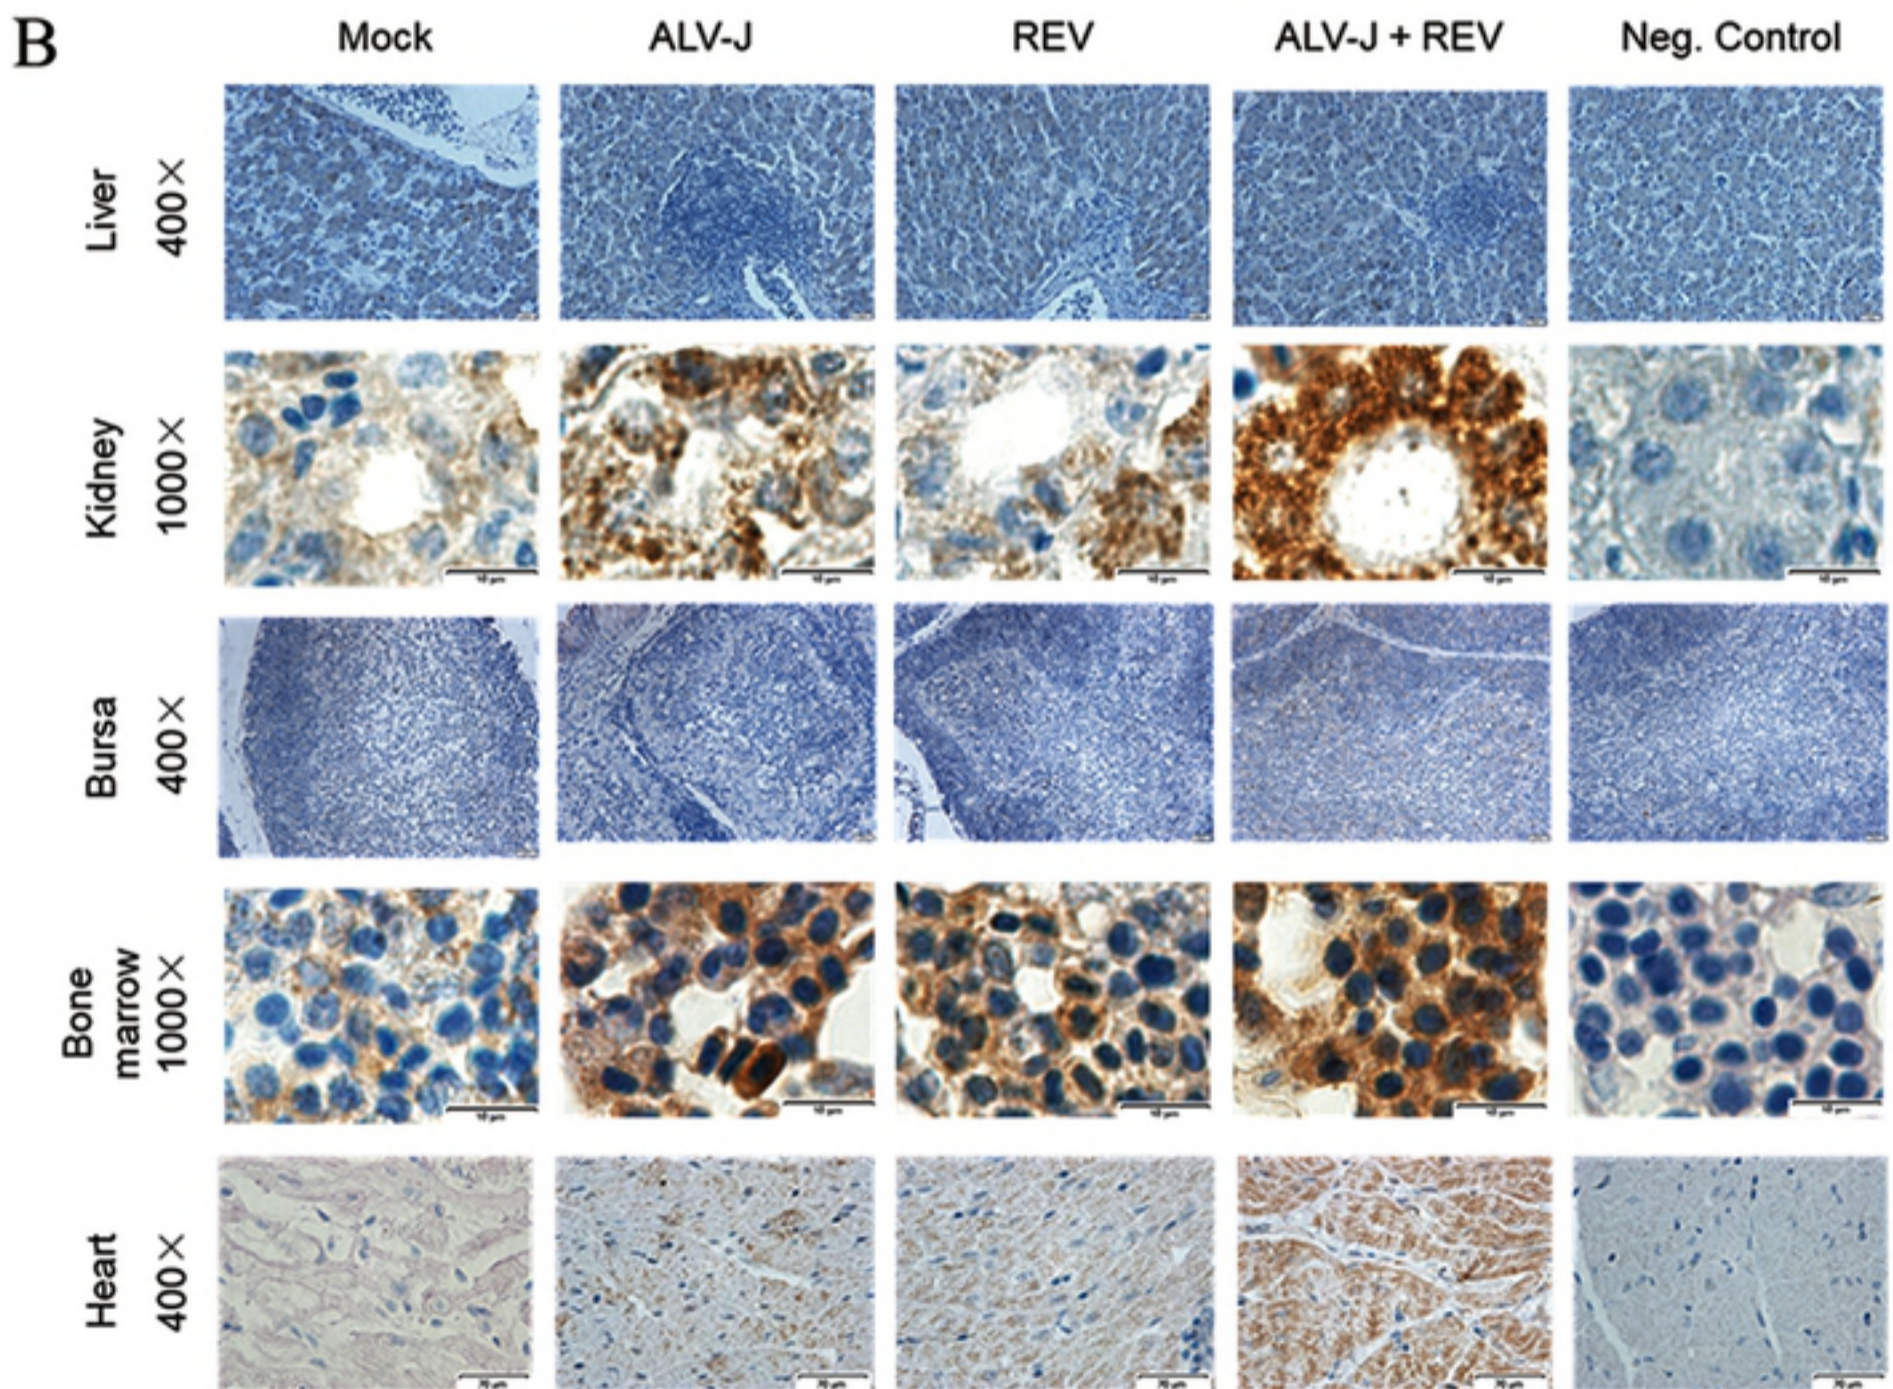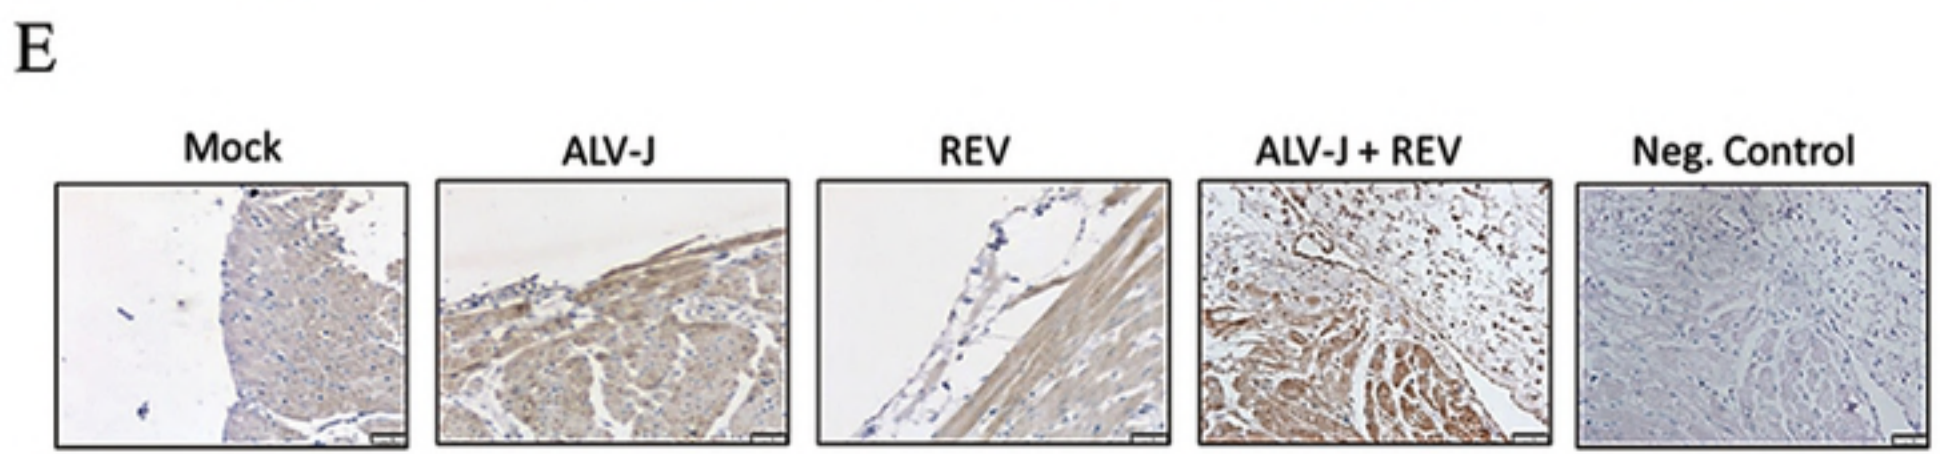



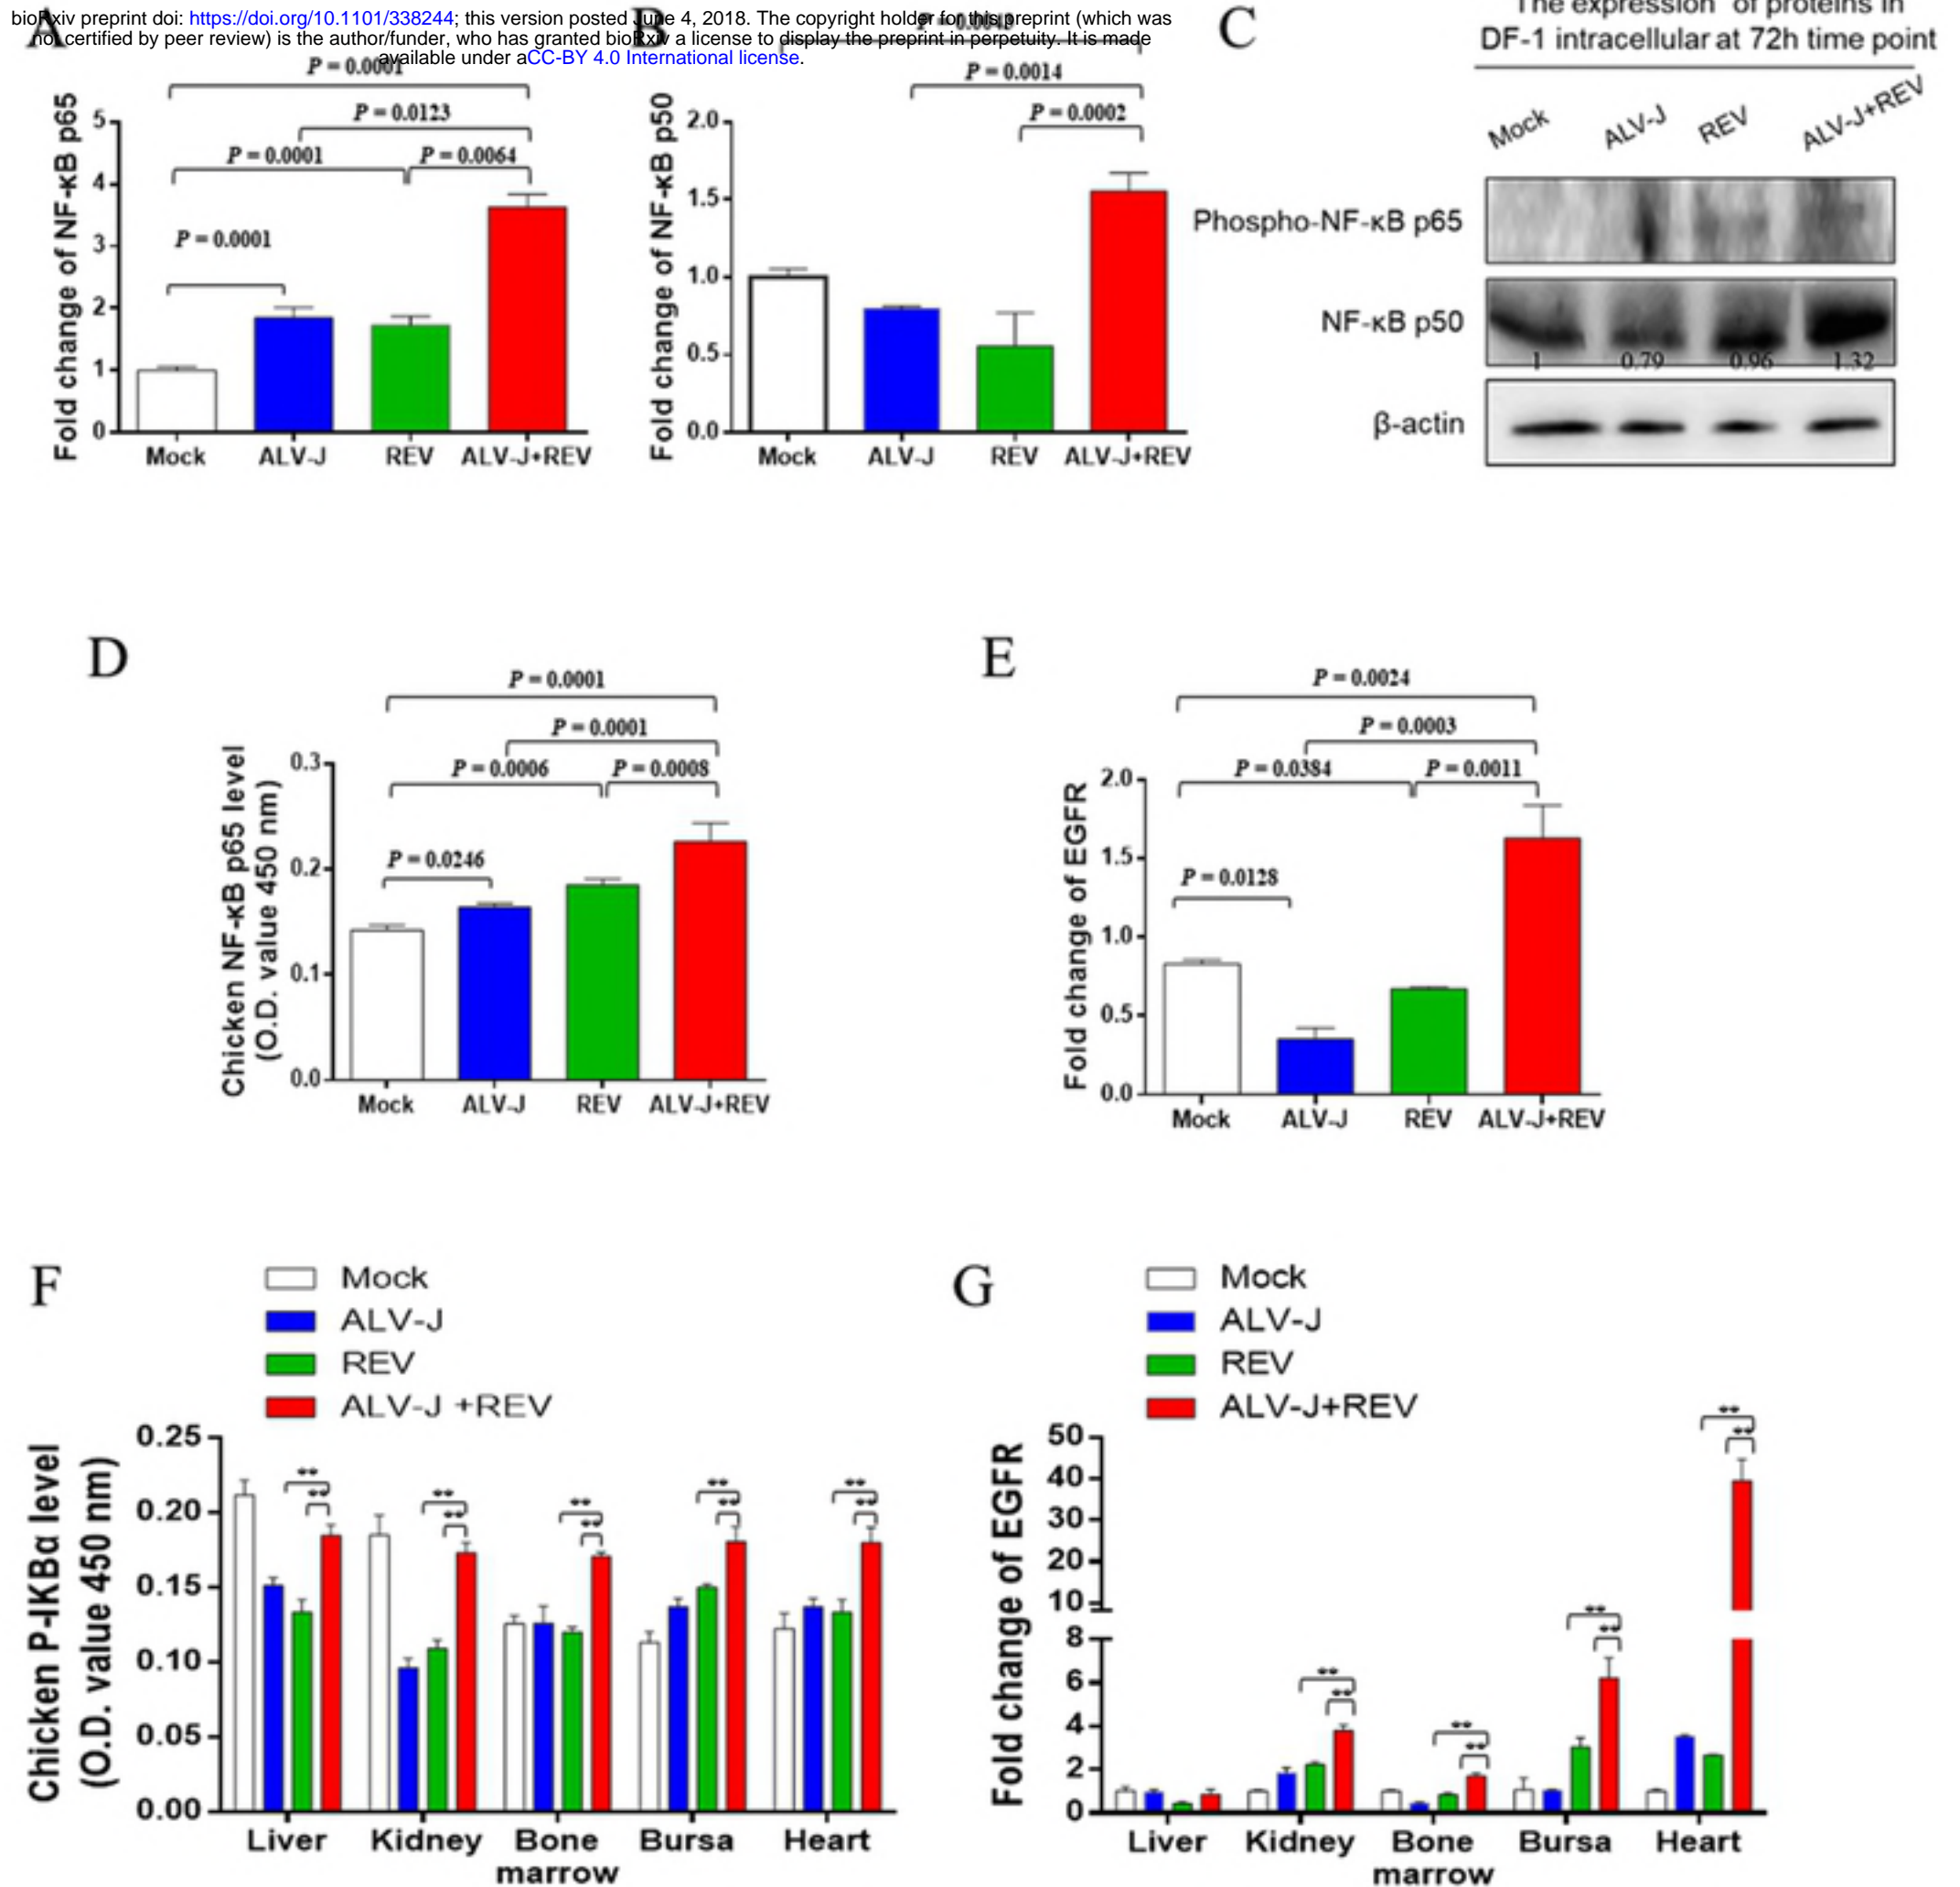

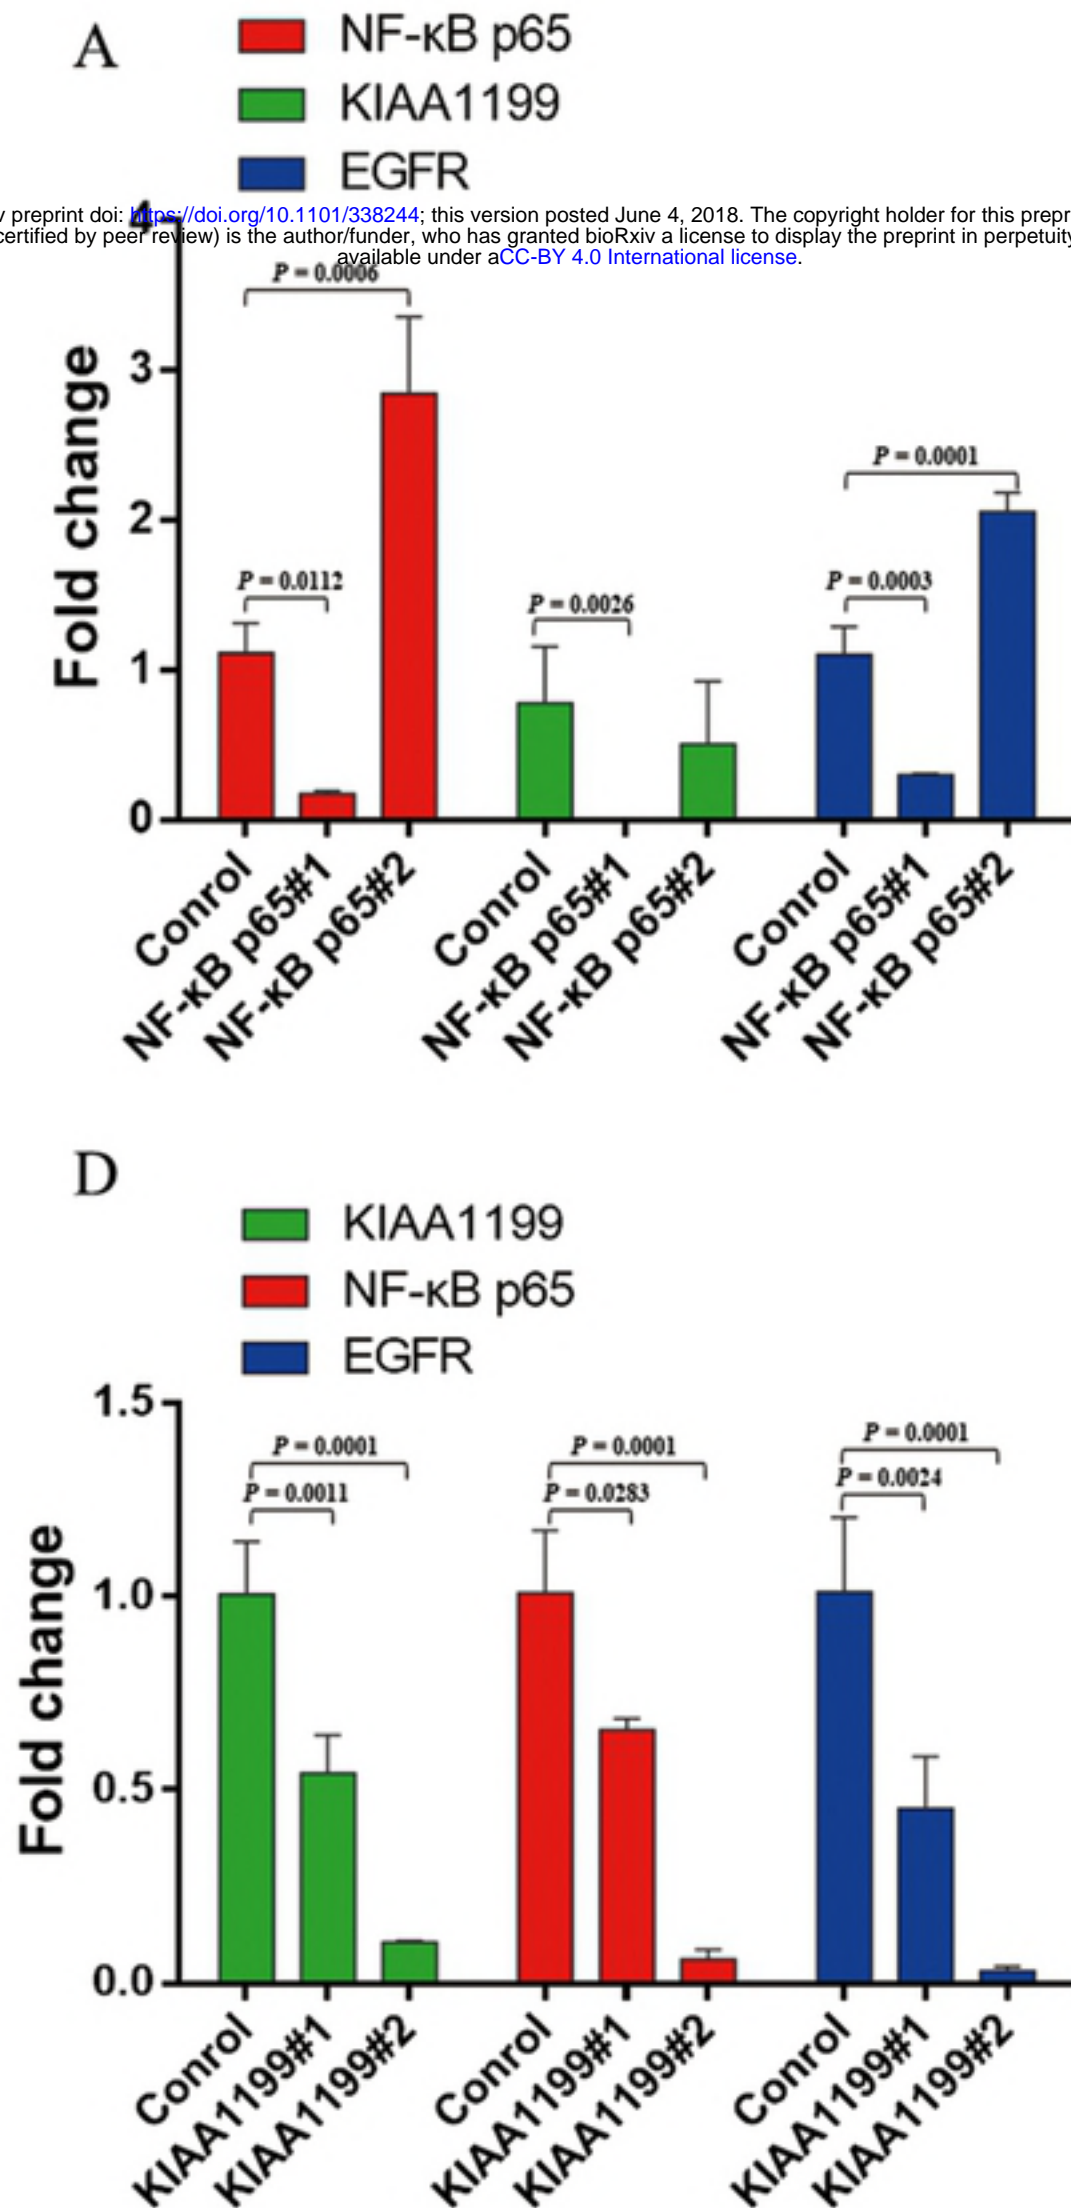



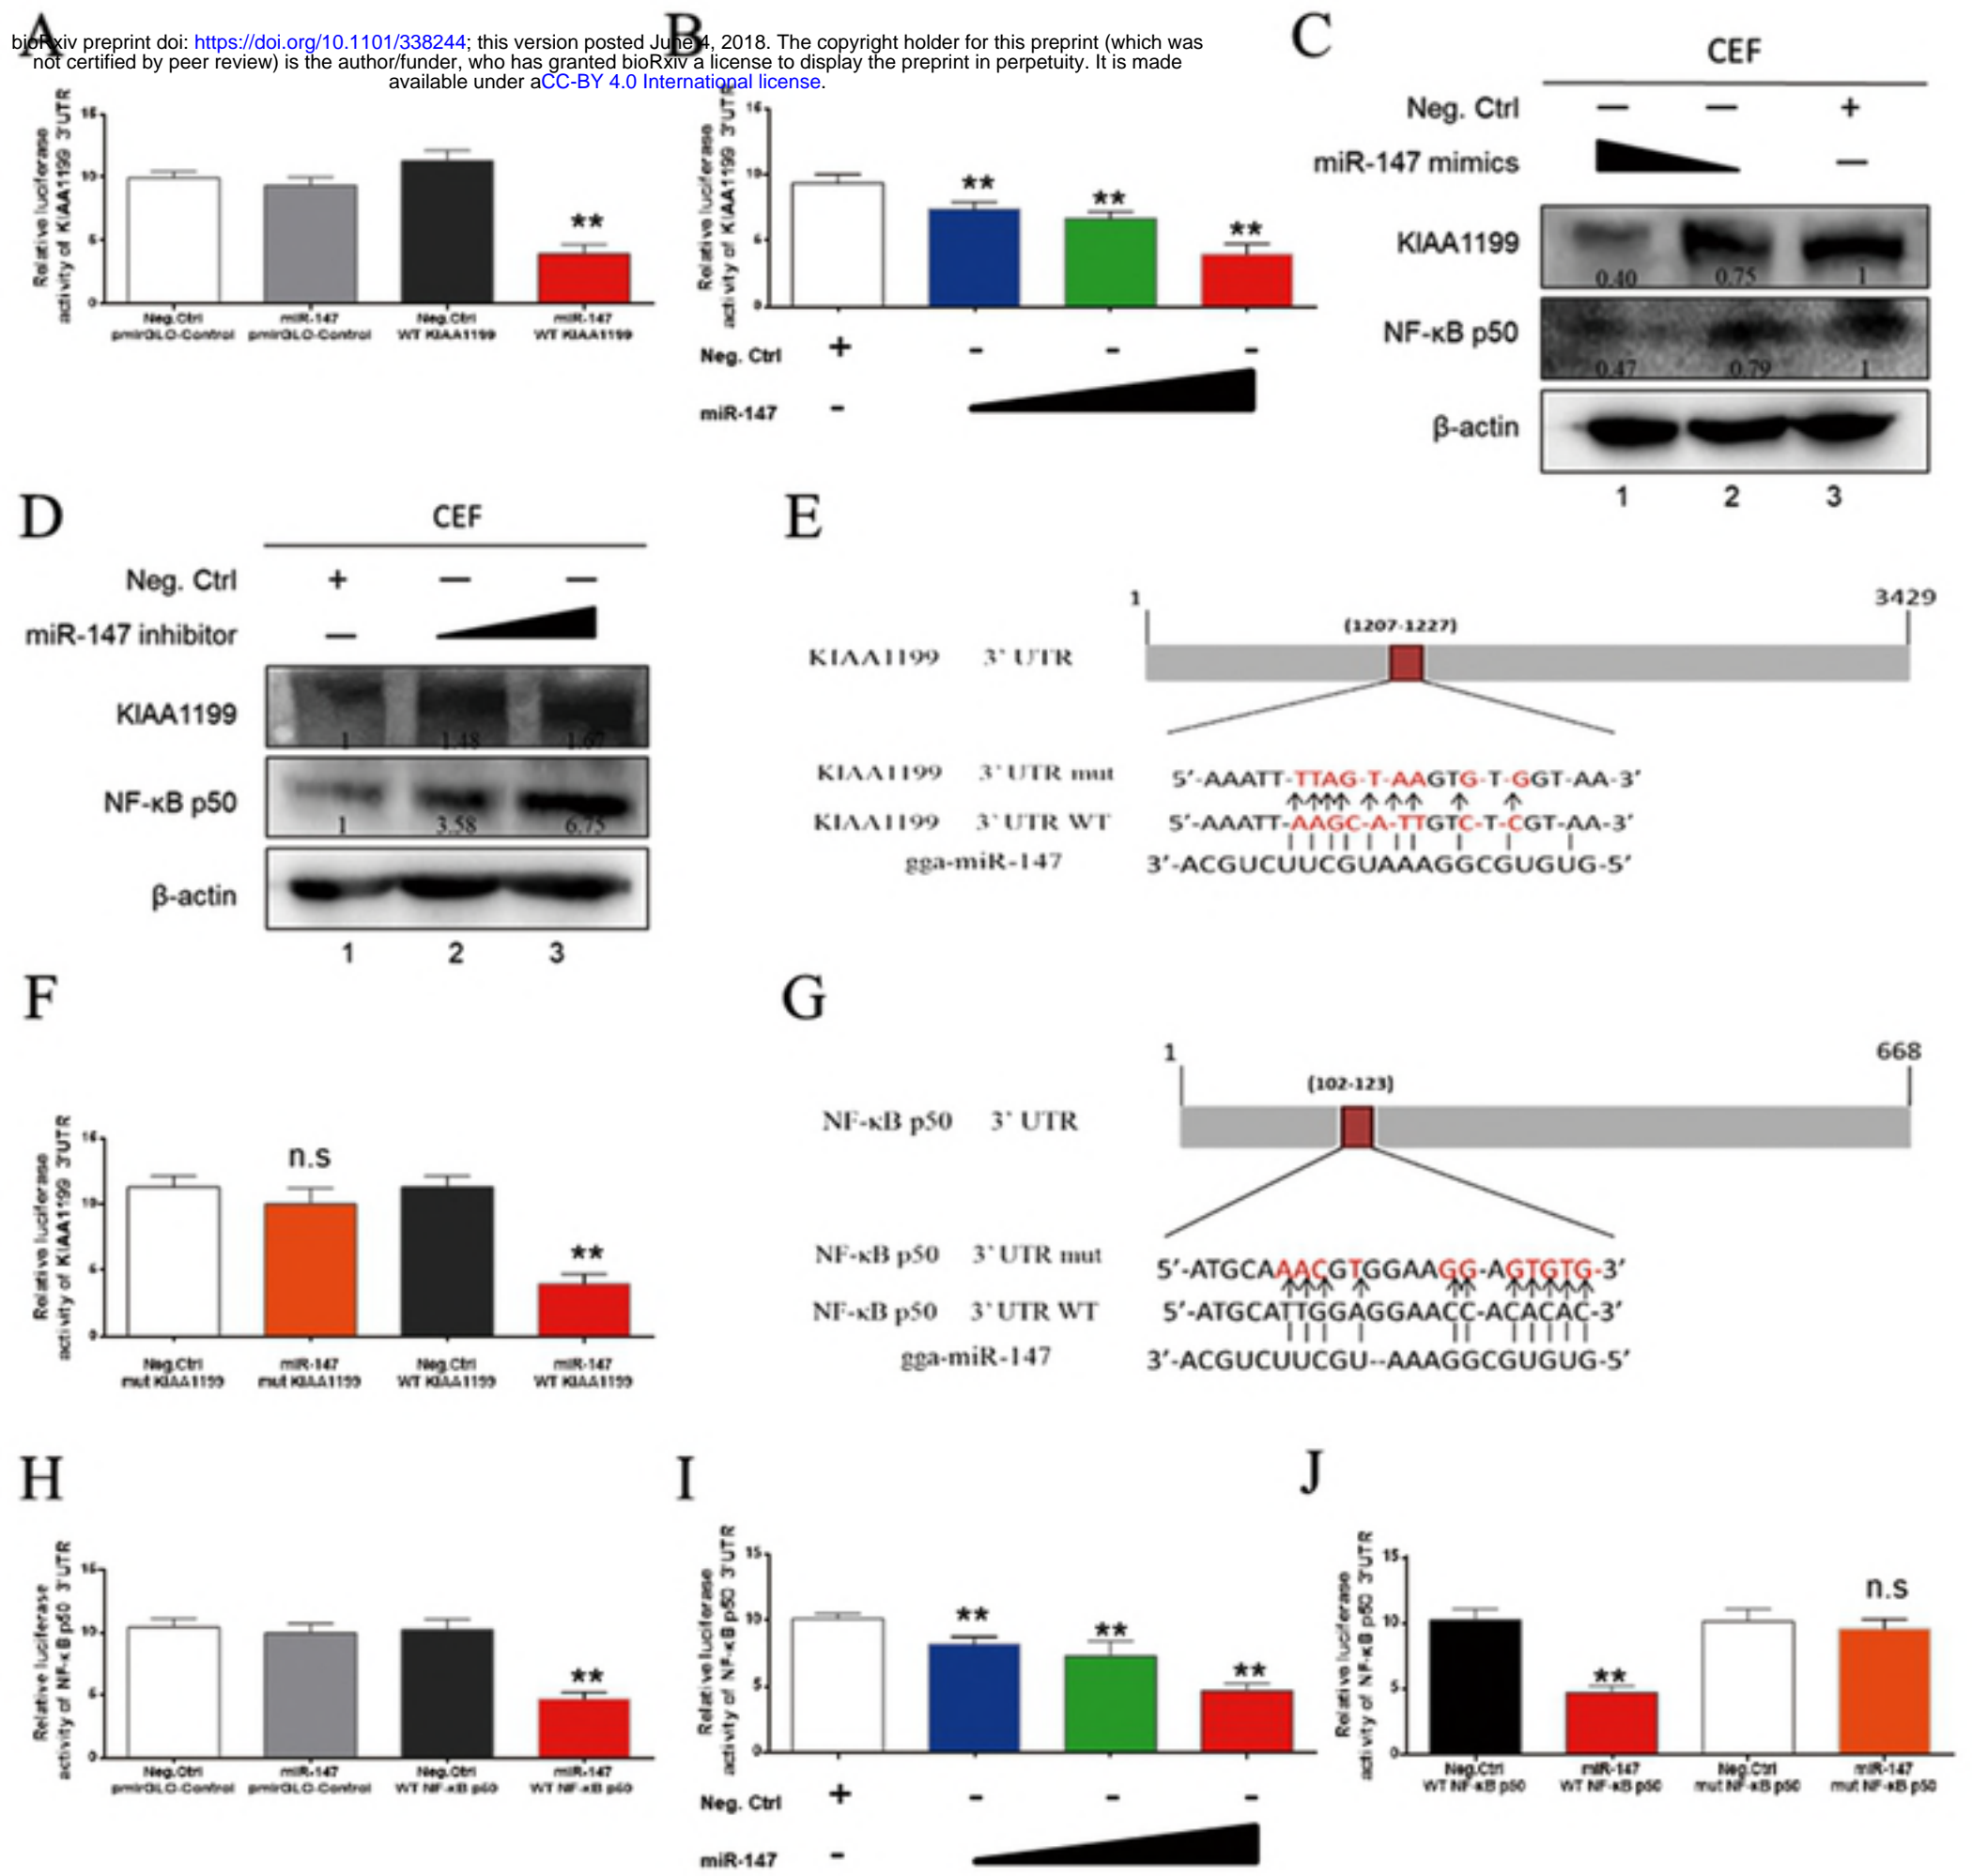

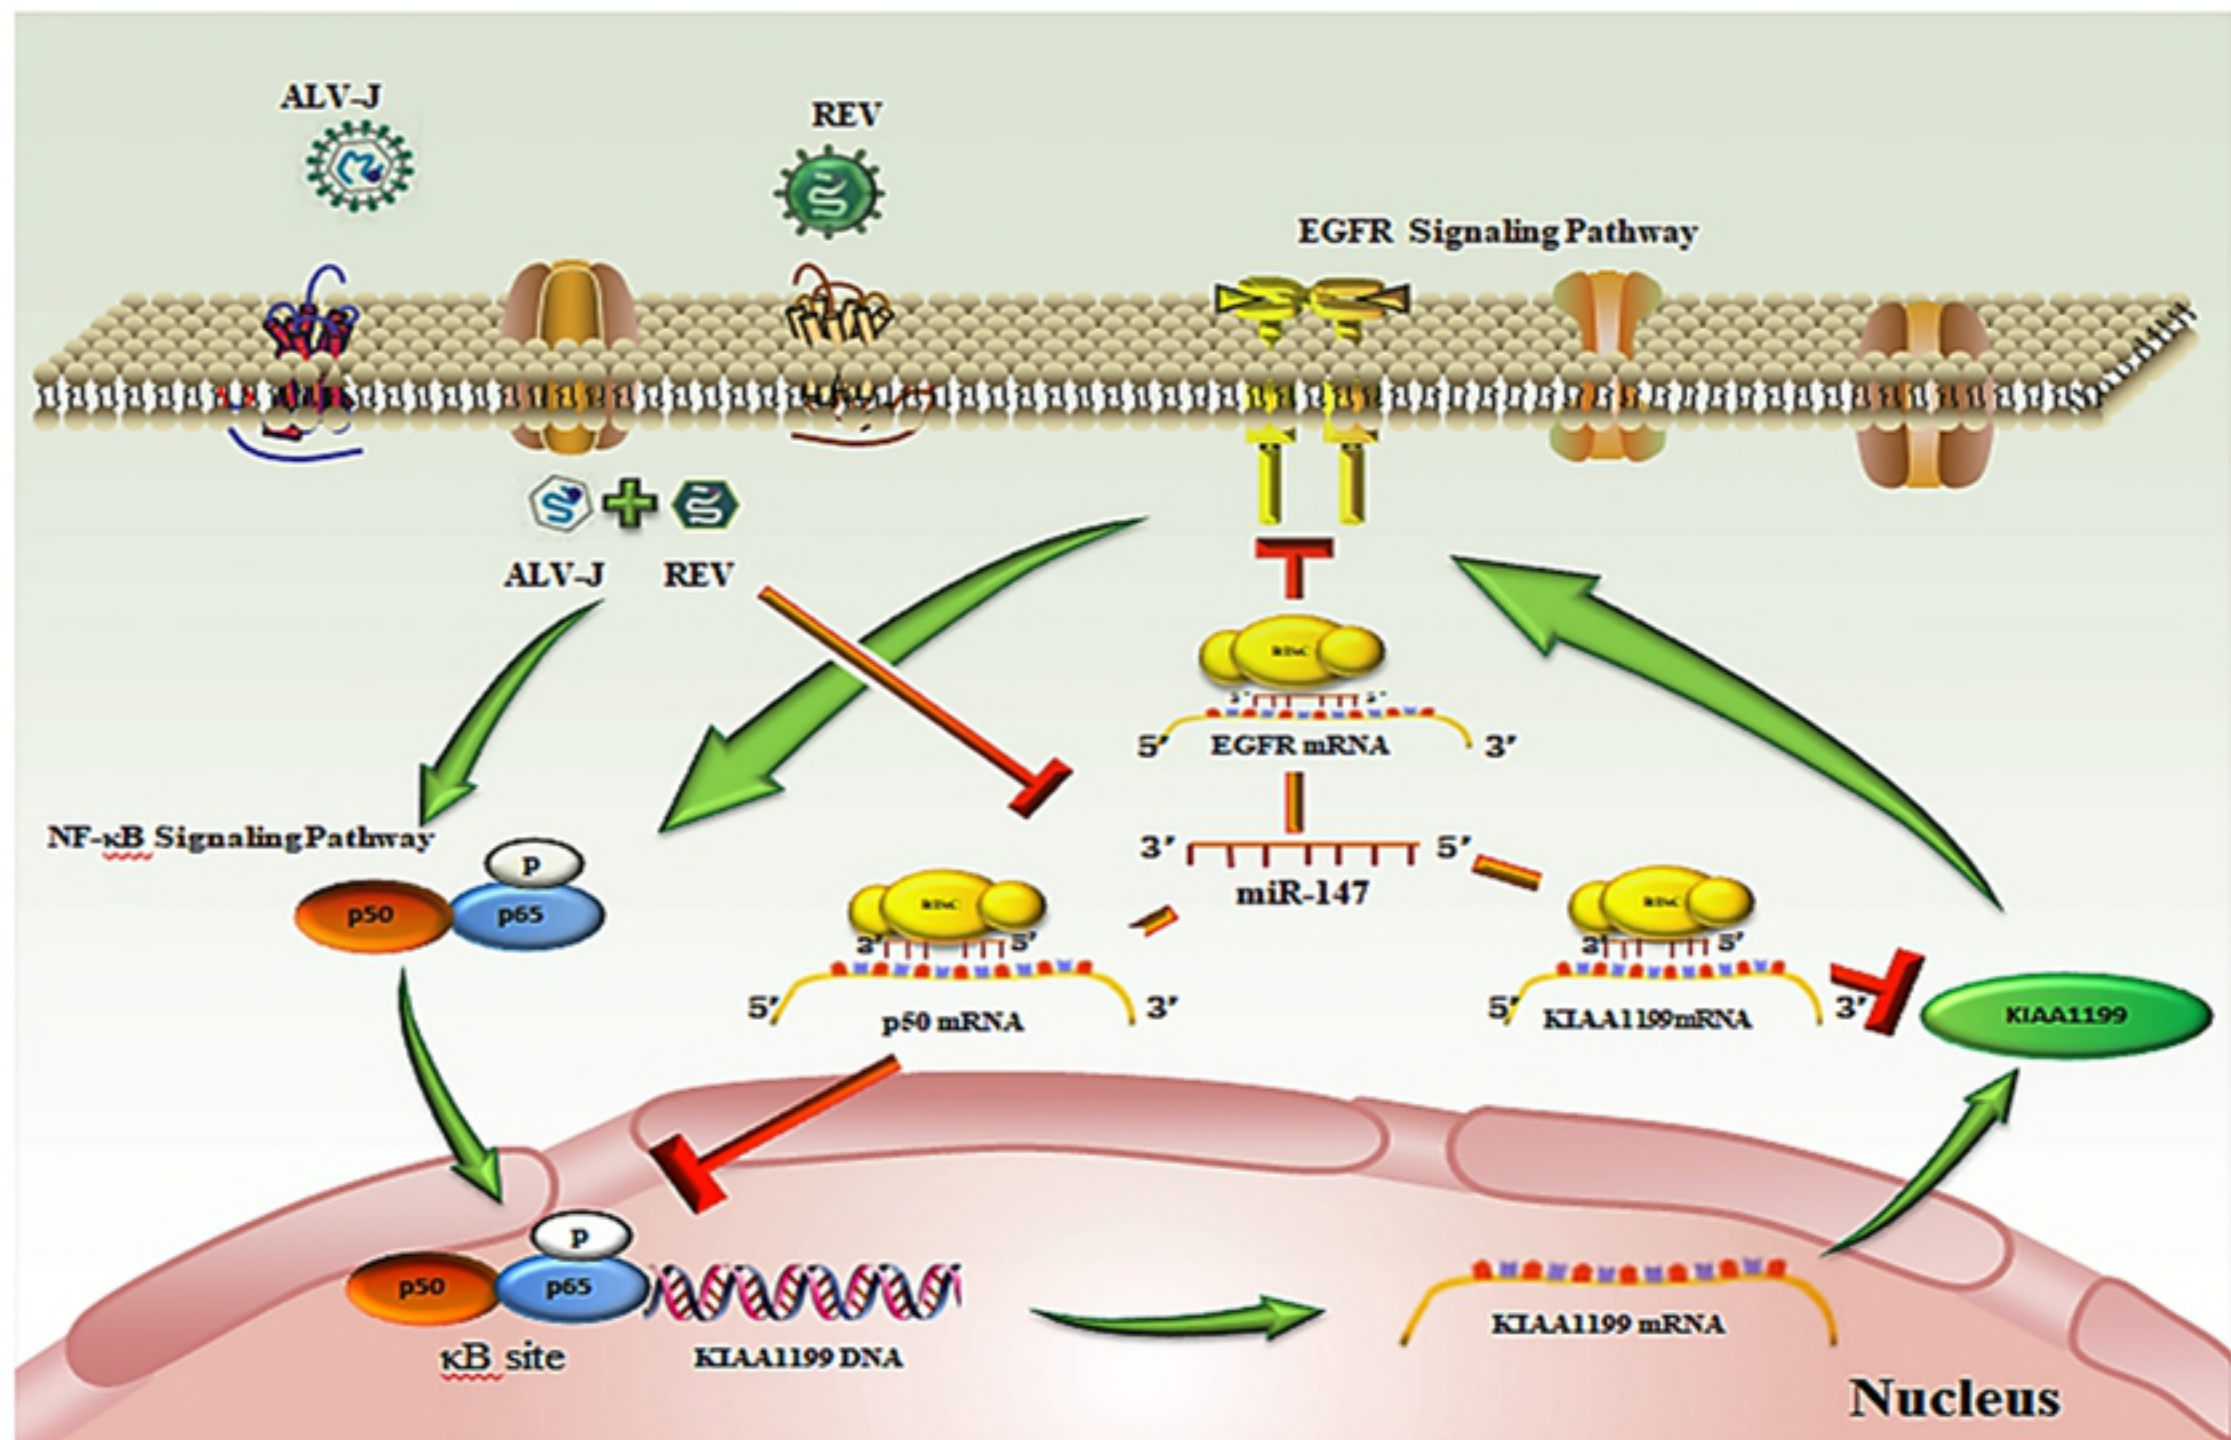

Source: https://www.biorxiv.org/content/10.1101/338244v1.full.pdf
